# Supplementary material for: Coenzyme Q deficiency causes impairment of the sulfide oxidation pathway
Source: PubMed Central journal article supplement (PMC5210092; doi:10.15252/emmm.201606356), 2016-11-17
Supplement: EMMM-9-96-s001.pdf [file EMMM-9-96-s001.pdf]

## **Coenzyme Q deficiency causes impairment of the sulfide oxidation pathway**

Marcello Ziosi<sup>1\*</sup>, Ivano Di Meo<sup>2\*</sup>, Giulio Kleiner<sup>1</sup>, Xing-Huang Gao<sup>3</sup>, Emanuele Barca<sup>1,4</sup>, Maria J Sanchez-Quintero<sup>1</sup>, Saba Tadesse<sup>1</sup>, Hongfeng Jiang<sup>5</sup>, Changhong Qiao<sup>5</sup>, Richard J Rodenburg<sup>6</sup>, Emmanuel Scalais<sup>7</sup>, Markus Schuelke<sup>8</sup>, Belinda Willard<sup>9</sup>, Maria Hatzoglou<sup>3</sup>, Valeria Tiranti<sup>2#</sup> and Catarina M Quinzii<sup>1#</sup>

\*These authors contributed equally to the work

#Co-last, co-corresponding authors

### **Appendix Table of contents:**

#### **Appendix Supplementary Methods**

#### **Appendix Figure Legends**

#### **Appendix Figures S1-S4**

#### **Appendix Tables S1-S2**

### **Appendix supplementary methods**

#### **MitoSox**

To estimate production of ROS, 80% confluent control and mutant skin fibroblasts cultured in DMEM medium were exposed to MitoSOX Red, a fluorochrome specific for anion superoxide produced in the inner mitochondrial compartment (Molecular Probes, Invitrogen Corp., Eugene, OR, USA) as previously described (Quinzii Faseb 2008; Quinzii Faseb 2010). Nuclei were stained with DAPI (0.1 µg/ml) and MitoSOX intensity was monitored by fluorescence microscopy (Nikon Eclipse TE-2000). Images were elaborated and fluorescence intensity was measured with ImageJ.

#### **Acylcarnitines determination**

##### ***Sample preparation***

All solvents for sample preparation and UPLC/MS/MS analysis were LC/MS grade (Fisher Scientific; Pittsburgh, PA). Free carnitine and fatty acylcarnitine standards were purchased from Toronto Research Chemicals (Toronto, Ontario, Canada) and R&D Systems, Inc. (Minneapolis, MN, USA). Deuterated internal standards were purchased from Cambridge Isotope Laboratories, Inc. (Tewksbury, MA, USA).

All the procedures were carried out on ice or at 4°C. An aliquot of 100 µl methanol containing internal standards was added to 50 µl of plasma in a 1.5 ml microcentrifuge tube. After vortexing, 400 µl acetonitrile were added to the sample. The samples were vortexed at 2,000 rpm for 30 minutes and centrifuged at 20,000 x g for 10 min. The clear supernatant was transferred to an Agilent micro sampling vial (Agilent Technologies, Cat No 5184-3550, Santa Clara, CA, USA). The supernatant was evaporated to dryness with nitrogen at room temperature and subsequently reconstituted in 100 µl of 1:9 (v:v) methanol/water containing 10 mM ammonium acetate and 10 mM heptafluorobutyric acid for injection.

### ***LC-MS Conditions***

All experiments were carried out on an Agilent 6410 Triple Quad LC-MS/MS system. 2.5 µl are loaded onto an Agilent Poroshell 120 EC-C18 column (3.0 mm inner diameter × 50 mm with 2.7 µm particles). The column is maintained at 50°C throughout analysis. The initial conditions were as follows: 500 µl/min with a mobile phase composition of 98% solvent A (water containing 10 mM ammonium acetate and 10 mM heptafluorobutyric acid) and 2% solvent B (methanol containing 10 mM ammonium acetate and 10 mM heptafluorobutyric acid). Initial conditions are maintained for 1 minute. Solvent B is linearly increased to 90% over 5 minutes and maintained for 1 more minute. The column is cleaned with 98% solvent B for 3 minutes and conditioned with 2% solvent B for 3 minutes before the next injection. Carnitine and acylcarnitines of interest elute between 1.3 and 6.8 min. Positive electrospray tandem mass spectrometry (ESI-MS/MS) under multiple reactions monitoring mode (MRM) was performed employing the following parameters: capillary voltage, 2,000 V; gas temperature, 350 °C; gas flow, 13 l/min; nebulizer, 60 psi. Different species were identified by comparing the retention times of experimental compounds with those of authentic standards. Concentrations of carnitine and acylcarnitines in the serum were quantified by comparing integrated peak areas for those of each carnitines against those of known amounts of purified standards.

### **Mitochondrial respiratory chain enzyme activities in mouse tissues**

Cytochrome oxidase (COX, complex IV), Citrate Synthase (CS) and Succinate Dehydrogenase (SDH, complex II) activities were measured by spectrophotometric assay. COX activity was measured following the oxidation of Cyt *C* catalyzed by cytochrome oxidase. Samples were incubated in medium containing 0.01 mM KH<sub>2</sub>PO<sub>4</sub> (pH 7.0) and 1% reduced Cyt *C*, and the reaction followed for 3 min at 550 nm. The results were expressed in  $\mu\text{mol oxidized Cyt } C/\text{min/mg protein}$ . CS activity was measured following the reduction of 1 mM 5,5'-dithiobis(2-nitrobenzoic acid) in 1 M Tris-HCl (pH 8.1) at 412 nm for 2 min in the presence of 10 mM acetyl-CoA, and 10 mM oxalacetic acid. CS activity was expressed as  $\text{nmol/min/g tissue}$ . Succinate dehydrogenase activity was measured following reduction of 2,6 dichlorophenol-indophenol (DCIP) at 600 nm for 1 min. Enzymes activities were normalized to protein concentrations.

### **Appendix Supplementary figure legends**

**Appendix Fig. S1- Complex II-driven ADP-dependent respiration in fibroblasts:** (A) Traces and (B) values of CIV-driven oxygen consumption in  $3 \times 10^6$  control (C) and 5 patient fibroblasts (P1-5). See Materials and Methods for the role and concentration of the compounds used.

**Appendix Fig.S2- Complex IV-driven respiration in fibroblasts:** (A) Representative traces and (B) values of CIV-driven oxygen consumption in  $3 \times 10^6$  control (C) and 5 patient fibroblasts (P1-5). See Materials and Methods for the role and concentration of the compounds used. Error bars represent SDs of two experiments.

**Appendix Fig.S3- MitoSoX staining in COQ mutant fibroblasts:** Relative MitoSox fluorescence intensity normalized to the background signal in control (C, N=2) and patients (P3, P4) fibroblasts. Error bars represent SDs of two experiments.

**Appendix Fig.S4- NaSH treatment in control fibroblasts:** (A) Representative western blots showing the level of SQR in two controls (C1 and C2) treated (+) and untreated (-) with NaSH for 24hrs. (B) Relative levels of SQR proteins normalized to Vinculin in

untreated controls and NaHS treated cells. (C) Relative levels of *SQR* transcripts normalized to *GAPDH*. Error bars represent SDs of 6 experiments.

### **Appendix Supplementary table legends**

**Appendix Table S1:** Quantitation of cysteine containing peptides identified in the LC-MS/MS analysis of P1 and P4

**Appendix Table S2:** Acylcarnitines profile in blood of *Pdss2<sup>kd/kd</sup>* mice

# Appendix Fig S1

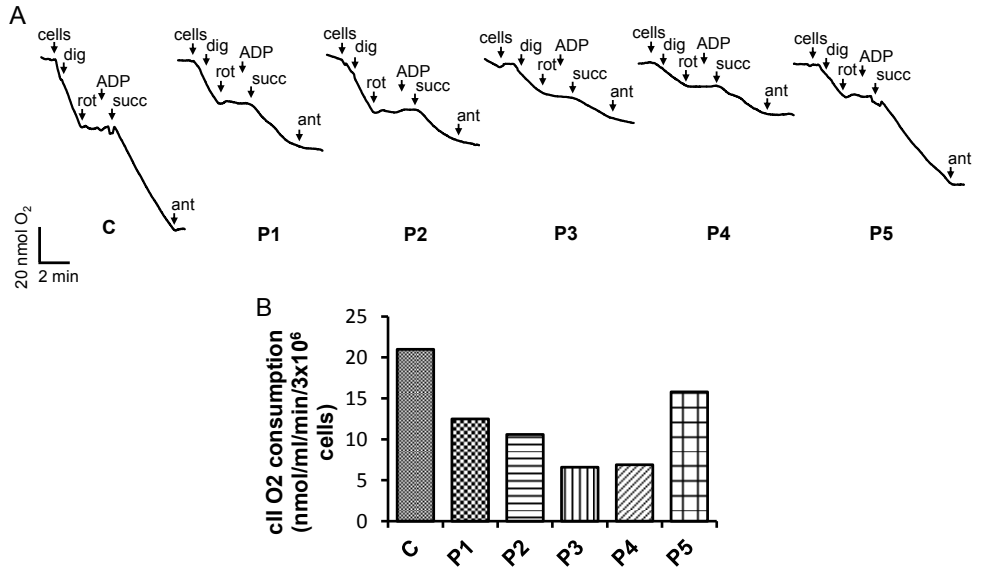

## Appendix Fig S2

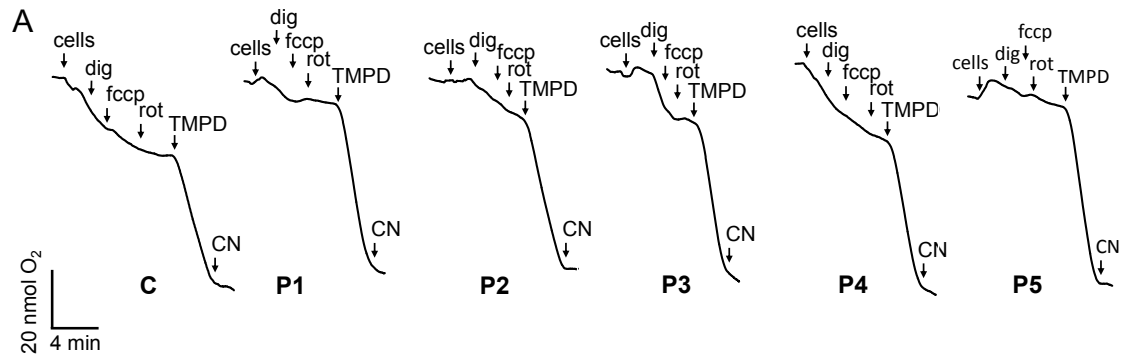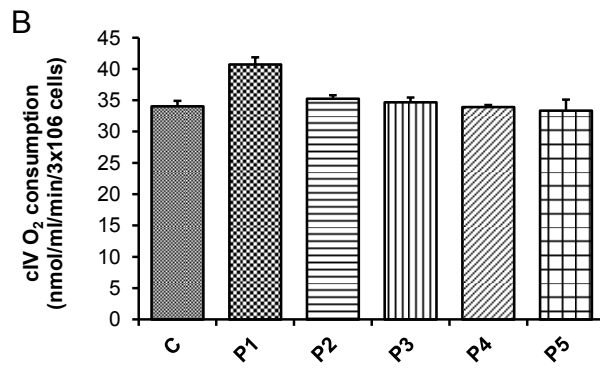

### Appendix Fig S3

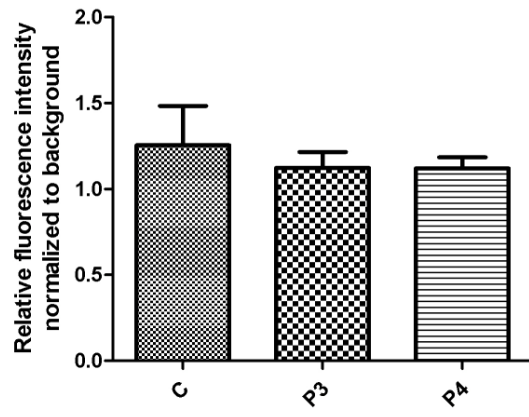

## Appendix Fig S4

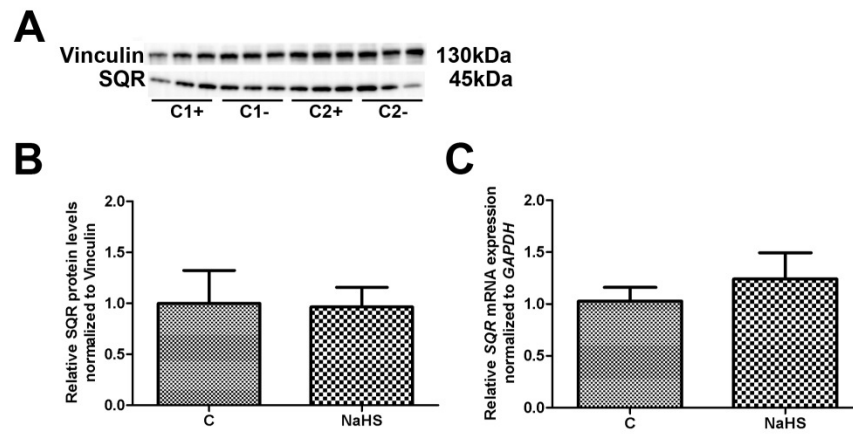



**Appendix Table S1:** Quantitation of cysteine containing peptides identified in the LC-MS/MS analysis of P1 and P4

| Protein                                        | Gene ID | Accession | [M+H]    | Sequence                    | Site | Ratios |       |
|------------------------------------------------|---------|-----------|----------|-----------------------------|------|--------|-------|
|                                                |         |           |          |                             |      | P1     | P4    |
| 14-3-3 protein gamma                           | YWHAQ   | P61981    | 1313.531 | NcSETQYESK                  | C2   | 1.666  | 1.791 |
| 14-3-3 protein theta                           | YWHAQ   | P27348    | 1202.454 | YDDMATcMK                   | C7   | 1.321  | 1.341 |
| 14-3-3 protein theta                           | YWHAQ   | P27348    | 1341.615 | YLAEVAcGDDR                 | C7   | 1.262  | 2.184 |
| 14-3-3 protein theta                           | YWHAQ   | P27348    | 1459.773 | SlcTTVLELLDK                | C3   | 1.274  | 1.637 |
| 14-3-3 protein theta                           | YWHAQ   | P27348    | 1469.714 | YLAEVAcGDDRK                | C7   | 2.132  | -     |
| 14-3-3 protein zeta/delta                      | YWHAZ   | P63104    | 1177.474 | YDDMAAcMK                   | C7   | 1.288  | 1.500 |
| 14-3-3 protein zeta/delta                      | YWHAZ   | P63104    | 1491.778 | DlcNDVLSLLEK                | C3   | 1.909  | 1.312 |
| 26S protease regulatory subunit 7              | PSMC2   | P35998    | 1414.686 | SVcTEAGMFAIR                | C3   | -      | -     |
| 26S proteasome non-ATPase regulatory subunit 2 | PSMD2   | Q13200    | 1541.809 | SGALLAcGIVNSGVR             | C7   | -      | -     |
| 40S ribosomal protein S12                      | RPS12   | P25398    | 1134.600 | LGEWVGLcK                   | C8   | -      | -     |
| 40S ribosomal protein S12                      | RPS12   | P25398    | 1824.009 | LVEALcAEHQINLIK             | C6   | -      | -     |
| 40S ribosomal protein S17                      | RPS17   | P0CW22    | 1326.699 | VcEEIAIIPSK                 | C2   | 1.400  | 1.928 |
| 40S ribosomal protein S2                       | RPS2    | P15880    | 863.483  | cGSVLVR                     | C1   | 1.659  | 1.789 |
| 40S ribosomal protein S2                       | RPS2    | P15880    | 1212.612 | GcTATLGNFAK                 | C2   | 1.442  | 2.169 |
| 40S ribosomal protein S21                      | RPS21   | P63220    | 1092.550 | TYAIcGAIR                   | C5   | 1.415  | -     |
| 40S ribosomal protein S27                      | RPS27   | P42677    | 1042.505 | LTEGcSFR                    | C5   | 1.418  | 1.897 |
| 40S ribosomal protein S28                      | RPS28   | P62857    | 1289.591 | TGSQGQcTQVR                 | C7   | 1.344  | 1.902 |
| 40S ribosomal protein S29                      | RPS29   | P62273    | 986.460  | YGLNMcR                     | C6   | 3.327  | -     |
| 40S ribosomal protein S3                       | RPS3    | P23396    | 1361.727 | GLcAIAQAESLR                | C3   | -      | -     |
| 40S ribosomal protein S3a                      | RPS3A   | P61247    | 1651.776 | NcLTNFHGMDLTR               | C2   | -      | 2.849 |
| 40S ribosomal protein S3a                      | RPS3A   | P61247    | 1772.879 | AcQSIYPLHDV FVR             | C2   | 1.437  | -     |
| 40S ribosomal protein S4, X isoform            | RPS4X   | P62701    | 1341.761 | EcLPLIIFLR                  | C2   | 2.033  | 1.590 |
| 40S ribosomal protein S4, X isoform            | RPS4X   | P62701    | 1855.891 | FDTGNLcMVTGGANLGR           | C7   | 1.615  | -     |
| 40S ribosomal protein S5                       | RPS5    | P46782    | 1574.854 | VNQAIWLLcTGAR               | C9   | 1.431  | 2.024 |
| 40S ribosomal protein S5                       | RPS5    | P46782    | 1699.861 | TIAEcLADELINAAK             | C5   | 1.309  | -     |
| 40S ribosomal protein S6                       | RPS6    | P62753    | 1408.730 | LNISFPATGcQK                | C10  | 1.677  | -     |
| 40S ribosomal protein S8                       | RPS8    | P62241    | 1523.797 | NcIVLIDSTPYR                | C2   | -      | -     |
| 40S ribosomal protein SA                       | RPSA    | P08865    | 1379.706 | YVDIAIPcNNK                 | C8   | 1.895  | -     |
| 40S ribosomal protein SA                       | RPSA    | P08865    | 3064.508 | ADHQPLTEASYVNLPTIALcNTDSPLR | C20  | 1.609  | 1.686 |
| 4F2 cell-surface antigen heavy chain           | SLC3A2  | P08195    | 1353.647 | WcSWLSLQAR                  | C2   | 0.858  | 3.424 |
| 4-trimethylaminobutyraldehyde dehydrogenase    | ALDH9A1 | P49189    | 941.412  | DDMTcVK                     | C5   | 1.744  | 1.460 |
| 4-trimethylaminobutyraldehyde dehydrogenase    | ALDH9A1 | P49189    | 1285.652 | VIATFTcSGEK                 | C7   | 2.320  | 3.331 |
| 5'-nucleotidase                                | NT5E    | P21589    | 823.397  | cMGGVAR                     | C1   | 0.515  | -     |
| 60 kDa heat shock protein, mitochondrial       | HSPD1   | P10809    | 1752.932 | AAVEEGIVLGGcALLR            | C13  | 1.228  | 2.894 |
| 60S acidic ribosomal protein P0                | RPLP0   | P05388    | 1339.677 | cFIVGADNVGSK                | C1   | 4.183  | -     |

|                                                               |        |        |          |                                                                   |     |       |       |
|---------------------------------------------------------------|--------|--------|----------|-------------------------------------------------------------------|-----|-------|-------|
| 60S acidic ribosomal protein P1                               | RPLP1  | P05386 | 3882.008 | ALANVNI <sup>SLI</sup><br>cNVGAGGPAP<br>AAGAAPAGGP<br>APSTAAAPAEK | C12 | 1.771 | -     |
| 60S ribosomal protein L10                                     | RPL10  | P27635 | 1048.456 | MLScAGADR                                                         | C4  | -     | -     |
| 60S ribosomal protein L12                                     | RPL12  | P30050 | 1486.721 | cTGGEV <sup>GATS</sup><br>ALAPK                                   | C1  | 3.219 | 3.011 |
| 60S ribosomal protein L13a                                    | RPL13A | P40429 | 1502.712 | cEGINIS <sup>GNFYR</sup>                                          | C1  | 4.069 | -     |
| 60S ribosomal protein L14                                     | RPL14  | P50914 | 1283.643 | ALVDGPc <sup>TQV</sup><br>R                                       | C7  | 1.412 | 1.572 |
| 60S ribosomal protein L14                                     | RPL14  | P50914 | 1341.697 | cMQLTDFILK                                                        | C1  | 2.437 | -     |
| 60S ribosomal protein L18                                     | RPL18  | Q07020 | 1189.641 | GcGTVLLS <sup>GPR</sup>                                           | C2  | 1.959 | -     |
| 60S ribosomal protein L18a                                    | RPL18A | Q02543 | 1528.749 | DLTTAGAV <sup>TQ</sup><br>cYR                                     | C11 | 1.845 | 2.435 |
| 60S ribosomal protein L18a                                    | RPL18A | Q02543 | 1675.808 | SSGEIVYc <sup>GQV</sup><br>FEK                                    | C8  | -     | -     |
| 60S ribosomal protein L23                                     | RPL23  | P62829 | 2038.070 | ISLGLPV <sup>GAVI</sup><br>NcADNTGAK                              | C13 | 1.935 | 1.988 |
| 60S ribosomal protein L24                                     | RPL24  | P83731 | 1262.613 | VELcSF <sup>SGYK</sup>                                            | C4  | -     | 2.188 |
| 60S ribosomal protein L27a                                    | RPL27A | P46776 | 1490.696 | NQSFc <sup>PTVNL</sup><br>DK                                      | C5  | 1.876 | -     |
| 60S ribosomal protein L3                                      | RPL3   | P39023 | 911.483  | YcQ <sup>VIR</sup>                                                | C2  | -     | 2.265 |
| 60S ribosomal protein L3                                      | RPL3   | P39023 | 1310.684 | VAcIGAW <sup>HPA</sup><br>R                                       | C3  | -     | 1.383 |
| 60S ribosomal protein L30                                     | RPL30  | P62888 | 1426.826 | LVILANNc <sup>PAL</sup><br>R                                      | C8  | 2.268 | 1.567 |
| 60S ribosomal protein L30                                     | RPL30  | P62888 | 1830.970 | VcTLA <sup>HDPGDS</sup><br>DIIR                                   | C2  | 1.870 | 1.318 |
| 60S ribosomal protein L30                                     | RPL30  | P62888 | 2087.999 | TGVHHYS <sup>GNN</sup><br>IELGTAcGK                               | C17 | -     | -     |
| 60S ribosomal protein L32                                     | RPL32  | P62910 | 1321.691 | ELEVLLMc <sup>NK</sup>                                            | C8  | -     | -     |
| 60S ribosomal protein L32                                     | RPL32  | P62910 | 1538.733 | SYcAEIA <sup>HNVS</sup><br>SK                                     | C3  | 2.788 | 3.340 |
| 60S ribosomal protein L34                                     | RPL34  | P49207 | 1017.455 | AYGGSMc <sup>AK</sup>                                             | C7  | 1.702 | 2.059 |
| 60S ribosomal protein L35a                                    | RPL35A | P18077 | 876.434  | cAY <sup>VYK</sup>                                                | C1  | -     | -     |
| 60S ribosomal protein L36                                     | RPL36  | Q9Y3U8 | 1300.604 | EVcGFAP <sup>YER</sup>                                            | C3  | 1.726 | 1.867 |
| 60S ribosomal protein L4                                      | RPL4   | P36578 | 1257.551 | SGQGAF <sup>GNMc</sup><br>R                                       | C10 | 1.741 | 1.506 |
| 60S ribosomal protein L4                                      | RPL4   | P36578 | 1384.638 | FcIWTE <sup>SAFR</sup>                                            | C2  | 1.669 | 2.207 |
| 60S ribosomal protein L4                                      | RPL4   | P36578 | 1678.864 | GPcIIYN <sup>EDNGI</sup><br>IK                                    | C3  | 1.231 | -     |
| 60S ribosomal protein L4                                      | RPL4   | P36578 | 2010.085 | YAIcSALA <sup>AASA</sup><br>LPALVMSK                              | C4  | 1.271 | 2.330 |
| 60S ribosomal protein L7a                                     | RPL7A  | P62424 | 1773.838 | TcTTVA <sup>AFTQVN</sup><br>SEDK                                  | C2  | 2.508 | 1.999 |
| 60S ribosomal protein L9                                      | RPL9   | P32969 | 1591.809 | MRPGVAc <sup>SVS</sup><br>QAQK                                    | C7  | -     | 2.664 |
| 6-phosphogluconate dehydrogenase, decarboxylating             | PGD    | P52209 | 1419.600 | SAVENc <sup>QDSW</sup><br>R                                       | C6  | 1.789 | 0.952 |
| 6-phosphogluconolactonase                                     | PGLS   | O95336 | 1251.546 | WTLGFc <sup>DER</sup>                                             | C6  | -     | 0.781 |
| 6-phosphogluconolactonase                                     | PGLS   | O95336 | 1419.671 | LcWFLD <sup>EAAA</sup><br>R                                       | C2  | -     | -     |
| 72 kDa type IV collagenase                                    | MMP2   | P08253 | 1103.482 | YESc <sup>TSAGR</sup>                                             | C4  | 2.440 | -     |
| Acetyl-CoA acetyltransferase, cytosolic                       | ACAT2  | Q9BWD1 | 2866.457 | ATVAPED <sup>VSE</sup><br>VIFGHVLAAGc<br>GQNPVR                   | C21 | 2.049 | -     |
| Acidic leucine-rich nuclear phosphoprotein 32 family member A | ANP32A | P39687 | 2045.963 | SLDLFNc <sup>EVTN</sup><br>LNDYR                                  | C7  | -     | -     |
| Aconitate hydratase, mitochondrial                            | ACO2   | Q99798 | 1918.870 | VGLIGSc <sup>TNSS</sup><br>YEDMGR                                 | C7  | -     | -     |
| Actin, cytoplasmic 1                                          | ACTB   | P60709 | 850.415  | cD <sup>VDIR</sup>                                                | C1  | 1.652 | -     |
| Actin, cytoplasmic 1                                          | ACTB   | P60709 | 2618.198 | LcYVALD <sup>FEQE</sup><br>MATAASSSSLE<br>K                       | C2  | 1.630 | 1.636 |
| Actin, gamma-enteric smooth muscle                            | ACTG2  | P63267 | 3261.542 | cPETLFQ <sup>PSFIG</sup><br>MESAGIHETTY<br>NSIMK                  | C1  | -     | -     |
| Actin-related protein 2                                       | ACTR2  | P61160 | 1367.708 | VVVC <sup>DNGTGF</sup><br>VK                                      | C4  | 1.305 | 0.915 |
| Actin-related protein 2/3                                     | ARPC1A | Q92747 | 964.493  | IVTc <sup>GADR</sup>                                              | C4  | 1.162 | -     |

|                                                   |         |        |          |                                                |     |       |       |
|---------------------------------------------------|---------|--------|----------|------------------------------------------------|-----|-------|-------|
| complex subunit 1A                                |         |        |          |                                                |     |       |       |
| Actin-related protein 2/3 complex subunit 2       | ARPC2   | O15144 | 1174.563 | NcFASVFEK                                      | C2  | 1.488 | 1.426 |
| Actin-related protein 3                           | ACTR3   | P61158 | 1316.661 | YSYVcPDLVK                                     | C5  | 1.791 | -     |
| Actin-related protein 3                           | ACTR3   | P61158 | 1411.663 | DYEEIGPSIcR                                    | C10 | -     | -     |
| Actin-related protein 3                           | ACTR3   | P61158 | 3126.601 | TLTGTVIDSGD<br>GVTHVIPVAE<br>GYVIGScIK         | C28 | -     | 0.922 |
| Adenosine kinase                                  | ADK     | P55263 | 1481.780 | SLIANLAAANc<br>YK                              | C11 | 0.560 | -     |
| Adenylyl cyclase-associated protein 1             | CAP1    | Q01518 | 1224.574 | TDGcHAYLSK                                     | C4  | 0.906 | -     |
| Adenylyl cyclase-associated protein 1             | CAP1    | Q01518 | 1236.630 | INSITVDNcK                                     | C9  | -     | -     |
| Adenylyl cyclase-associated protein 1             | CAP1    | Q01518 | 1308.653 | NSLDcEIVSAK                                    | C5  | 1.681 | 1.341 |
| Adenylyl cyclase-associated protein 1             | CAP1    | Q01518 | 1830.944 | ALLVTASQcQ<br>QPAENK                           | C9  | 2.314 | 2.102 |
| Adipocyte plasma membrane-associated protein      | APMAP   | Q9HDC9 | 852.445  | SPFLcR                                         | C5  | 1.614 | -     |
| ADP/ATP translocase 1                             | SLC25A4 | P12235 | 1717.769 | GADIMYTGTV<br>DcWR                             | C12 | -     | -     |
| ADP-ribosyl cyclase/cyclic ADP-ribose hydrolase 2 | BST1    | Q10588 | 1226.603 | VADFLSWcR                                      | C8  | -     | -     |
| ADP-ribosylation factor 4                         | ARF4    | P18085 | 1739.826 | NIcFTVWDVG<br>GQDR                             | C3  | 1.814 | -     |
| Alanine--tRNA ligase, cytoplasmic                 | AARS    | P49588 | 3525.800 | VVSIGVPVSEL<br>LDDPSGPAGSL<br>TSVEFcGGTHL<br>R | C28 | -     | -     |
| Alpha-2-HS-glycoprotein                           | AHSG    | P02765 | 920.492  | cNLLAEK                                        | C1  | -     | -     |
| Alpha-2-HS-glycoprotein                           | AHSG    | P02765 | 1405.554 | cDSSPDSAEDV<br>R                               | C1  | 0.483 | 0.115 |
| Alpha-2-HS-glycoprotein                           | AHSG    | P02765 | 1533.648 | cDSSPDSAEDV<br>RK                              | C1  | 0.448 | 0.110 |
| Alpha-actinin-1                                   | ACTN1   | P12814 | 1326.666 | DGLGFcALIHR                                    | C6  | 1.009 | -     |
| Alpha-actinin-1                                   | ACTN1   | P12814 | 1734.856 | IcDQWDNLGA<br>LTQK                             | C2  | 1.712 | -     |
| Alpha-actinin-1                                   | ACTN1   | P12814 | 2065.977 | MVSDINNAWG<br>cLEQVEK                          | C11 | -     | -     |
| Alpha-actinin-4                                   | ACTN4   | O43707 | 1247.663 | EGLLLWcQR                                      | C7  | -     | -     |
| Alpha-actinin-4                                   | ACTN4   | O43707 | 1465.707 | TFTAWcNSHL<br>R                                | C6  | -     | -     |
| Alpha-actinin-4                                   | ACTN4   | O43707 | 1629.759 | ELPPDQAEYcI<br>AR                              | C10 | -     | -     |
| Alpha-actinin-4                                   | ACTN4   | O43707 | 1681.866 | cQLEINFNTLQ<br>TK                              | C1  | -     | -     |
| Alpha-actinin-4                                   | ACTN4   | O43707 | 1697.827 | AcLISLGYDVE<br>NDR                             | C2  | 2.026 | 2.129 |
| Alpha-actinin-4                                   | ACTN4   | O43707 | 1826.849 | IcDQWDALGSL<br>THSR                            | C2  | 1.449 | -     |
| Aminopeptidase B                                  | RNPEP   | Q9H4A4 | 1725.900 | LDSHPcLEVTA<br>AALR                            | C6  | 0.856 | 0.655 |
| Annexin A1                                        | ANXA1   | P04083 | 877.523  | cLTAIVK                                        | C1  | 1.452 | 1.342 |
| Annexin A1                                        | ANXA1   | P04083 | 989.551  | ILVALcGGN                                      | C6  | 0.892 | 1.064 |
| Annexin A1                                        | ANXA1   | P04083 | 1809.875 | MYGISLcQAIL<br>DETK                            | C7  | 0.961 | -     |
| Annexin A5                                        | ANXA5   | P08758 | 1186.569 | ALLLLcGEDD                                     | C6  | 1.051 | 1.137 |
| Annexin A6                                        | ANXA6   | P08133 | 1091.547 | ALLALcGGED                                     | C6  | -     | 0.541 |
| Annexin A6                                        | ANXA6   | P08133 | 1114.580 | FMTILcTR                                       | C6  | 1.163 | 1.565 |
| Annexin A6                                        | ANXA6   | P08133 | 1142.625 | cLIEILASR                                      | C1  | 2.176 | 0.748 |
| Annexin A7                                        | ANXA7   | P20073 | 1250.641 | LLVSMcQGNR                                     | C6  | 1.378 | 2.046 |
| Annexin A7                                        | ANXA7   | P20073 | 1800.856 | LGTDEScFNMI<br>LATR                            | C7  | -     | -     |
| AP-2 complex subunit alpha-1                      | AP2A1   | O95782 | 1371.646 | AADLLYAMcD<br>R                                | C9  | 1.411 | 1.451 |
| AP-2 complex subunit beta                         | AP2B1   | P63010 | 1060.474 | EAQSIcER                                       | C6  | 1.372 | -     |
| AP-2 complex subunit beta                         | AP2B1   | P63010 | 1301.625 | DcEDPNPLIR                                     | C2  | 1.122 | -     |
| AP-2 complex subunit beta                         | AP2B1   | P63010 | 1366.712 | ITEYLcEPLR                                     | C6  | -     | -     |
| AP-2 complex subunit beta                         | AP2B1   | P63010 | 1463.823 | cVSTLLDLIQT<br>K                               | C1  | 1.698 | -     |
| Asparagine--tRNA ligase,                          | NARS    | O43776 | 1709.808 | YGTcPHGGYG                                     | C4  | -     | -     |

|                                                                      |        |        |          |                           |     |       |       |
|----------------------------------------------------------------------|--------|--------|----------|---------------------------|-----|-------|-------|
| cytoplasmic                                                          |        |        |          | LGLER                     |     |       |       |
| Asparagine--tRNA ligase, cytoplasmic                                 | NARS   | O43776 | 1756.900 | LMTDTINEPIL LcR           | C13 | 1.298 | -     |
| Aspartate aminotransferase, mitochondrial                            | GOT2   | P00505 | 1719.801 | TcGFDFTGAVE DISK          | C2  | -     | -     |
| ATP-citrate synthase                                                 | ACLY   | P53396 | 909.389  | NcGSFTR                   | C2  | 1.498 | 1.343 |
| ATP-citrate synthase                                                 | ACLY   | P53396 | 1228.596 | VDATADYIcK                | C9  | -     | -     |
| ATP-citrate synthase                                                 | ACLY   | P53396 | 1383.711 | FIcTTSAIQNR               | C3  | 1.761 | -     |
| ATP-citrate synthase                                                 | ACLY   | P53396 | 1733.799 | AVQGMLDFDY VcSR           | C12 | -     | -     |
| ATP-dependent 6-phosphofructokinase, liver type                      | PFKL   | P17858 | 1629.831 | VFANAPDSAc VIGLK          | C10 | -     | -     |
| ATP-dependent 6-phosphofructokinase, muscle type                     | PFKM   | P08237 | 1710.835 | IFANTPDSGcV LGMR          | C10 | -     | -     |
| ATP-dependent 6-phosphofructokinase, platelet type                   | PFKP   | Q01813 | 1018.553 | AAcNLLQR                  | C3  | -     | -     |
| ATP-dependent 6-phosphofructokinase, platelet type                   | PFKP   | Q01813 | 2243.138 | TNcNVAVINV GAPAAGMNA AVR  | C3  | 0.826 | -     |
| ATP-dependent RNA helicase A                                         | DHX9   | Q08211 | 1430.748 | AAEcNIVVTQP R             | C4  | 1.481 | -     |
| ATP-dependent RNA helicase DDX1                                      | DDX1   | Q92499 | 1238.662 | FLIcTDVAAR                | C4  | -     | -     |
| ATP-dependent RNA helicase DDX3Y                                     | DDX3Y  | O15523 | 1961.043 | VRPcVVYGGGA DIGQQIR       | C4  | 0.925 | 2.239 |
| BAG family molecular chaperone regulator 3                           | BAG3   | O95817 | 2267.975 | SQSPAASDcSS SSSSASLPSSG R | C9  | 1.991 | -     |
| Basement membrane-specific heparan sulfate proteoglycan core protein | HSPG2  | P98160 | 1103.468 | TDEANcPTK                 | C6  | 0.998 | 1.596 |
| Basement membrane-specific heparan sulfate proteoglycan core protein | HSPG2  | P98160 | 1243.580 | TcESLGAGGYR               | C2  | -     | -     |
| Basement membrane-specific heparan sulfate proteoglycan core protein | HSPG2  | P98160 | 1426.700 | TPSGLYLGTcE R             | C10 | -     | -     |
| Beta-actinin                                                         | ACTR1B | P42025 | 1266.657 | AcYLSINPQK                | C2  | -     | -     |
| Bifunctional purine biosynthesis protein PURH                        | ATIC   | P31939 | 1382.754 | VVAcNLYPFV K              | C4  | 0.725 | -     |
| Calcyclin-binding protein                                            | CACYBP | Q9HB71 | 1163.651 | TDTVLILcR                 | C8  | 1.287 | -     |
| Calpain small subunit 1                                              | CAPNS1 | P04632 | 1214.551 | TDGFGIDTeR                | C9  | 1.418 | 1.060 |
| Calpain-1 catalytic subunit                                          | CAPN1  | P07384 | 1149.576 | cLQSGTLFR                 | C1  | 2.298 | 0.752 |
| Calpain-1 catalytic subunit                                          | CAPN1  | P07384 | 1459.792 | LEIcNLTPDAL K             | C4  | -     | -     |
| Calpain-2 catalytic subunit                                          | CAPN2  | P17655 | 2057.017 | LEIcNLTPDTLT SDTYK        | C4  | -     | 0.997 |
| Calpastatin                                                          | CAST   | P20810 | 1371.710 | AAAPAPVSEA VcR            | C12 | -     | -     |
| Calpastatin                                                          | CAST   | P20810 | 1643.695 | cGEDDETIPSE YR            | C1  | -     | -     |
| Calponin-2                                                           | CNN2   | Q99439 | 1403.639 | cASQVGMTAP GTR            | C1  | 1.324 | 1.152 |
| Calponin-2                                                           | CNN2   | Q99439 | 1462.644 | cASQSGMTAY GTR            | C1  | 1.654 | 1.488 |
| Calponin-2                                                           | CNN2   | Q99439 | 1549.791 | AGQcVIGLQM GTNK           | C4  | -     | 0.799 |
| Calponin-3                                                           | CNN3   | Q15417 | 1446.651 | cASQAGMTAY GTR            | C1  | -     | -     |
| Calreticulin                                                         | CALR   | P27797 | 1549.713 | HEQNIDcGGG YVK            | C7  | 1.580 | 1.695 |
| Catalase                                                             | CAT    | P04040 | 1885.978 | LGPNYLHIPVN cPYR          | C12 | 1.358 | 3.188 |
| Catechol O-methyltransferase                                         | COMT   | P21964 | 1878.015 | YLPDLLLLLEc GLLR          | C11 | 1.953 | 1.163 |
| Catechol O-methyltransferase                                         | COMT   | P21964 | 1901.021 | LITIEINPDcAAI TQR         | C10 | -     | -     |
| Catenin alpha-1                                                      | CTNNA1 | P35221 | 1104.587 | IVAEcNAVR                 | C5  | 1.832 | 2.198 |
| Cathepsin B                                                          | CTSB   | P07858 | 1354.647 | EQWPQcPTIK                | C6  | 0.776 | 1.294 |
| Cathepsin B                                                          | CTSB   | P07858 | 1387.664 | IcEPGYSPTYK               | C2  | -     | 1.291 |
| Cathepsin B                                                          | CTSB   | P07858 | 1891.900 | GQDHcGIESEV VAGIPR        | C5  | 0.944 | 1.590 |

|                                                   |        |        |          |                                   |     |       |       |
|---------------------------------------------------|--------|--------|----------|-----------------------------------|-----|-------|-------|
| Cathepsin L1                                      | CTSL   | P07711 | 1520.722 | NHcGIASAASY<br>PTV                | C3  | 1.317 | -     |
| Cation-dependent mannose-<br>6-phosphate receptor | M6PR   | P20645 | 1117.546 | AVVMIScNR                         | C7  | 2.332 | -     |
| CD151 antigen                                     | CD151  | P48509 | 1076.594 | TVVALcGQR                         | C6  | -     | -     |
| CD166 antigen                                     | ALCAM  | Q13740 | 1747.911 | QIGDALPVScTI<br>SASR              | C10 | -     | -     |
| CD44 antigen                                      | CD44   | P16070 | 1226.627 | ALSIGFETcR                        | C9  | 2.231 | 1.410 |
| CD59 glycoprotein                                 | CD59   | P13987 | 1607.694 | FEHcNFNDVTT<br>R                  | C4  | 1.035 | 1.209 |
| CD81 antigen                                      | CD81   | P60033 | 1845.921 | NNLcPSGSNIIS<br>NLFK              | C4  | 1.035 | 2.354 |
| Cell cycle and apoptosis<br>regulator protein 2   | CCAR2  | Q8N163 | 1353.699 | VVTQNcQYR                         | C7  | 0.943 | 3.188 |
| Cellular nucleic acid-binding<br>protein          | CNBP   | P62633 | 1059.505 | cGESGHLAR                         | C1  | 1.818 | 2.372 |
| Cellular nucleic acid-binding<br>protein          | CNBP   | P62633 | 1101.504 | TSEVNcYR                          | C6  | 1.869 | 1.482 |
| Chloride intracellular channel<br>protein 1       | CLIC1  | O00299 | 1151.568 | IGNcPFSQR                         | C4  | 1.321 | -     |
| Chloride intracellular channel<br>protein 1       | CLIC1  | O00299 | 1645.869 | IEEFLEAVLcPP<br>R                 | C10 | 1.106 | -     |
| Chloride intracellular channel<br>protein 1       | CLIC1  | O00299 | 2001.007 | FLDGNELTLA<br>DeNLLPK             | C12 | 1.455 | -     |
| Chloride intracellular channel<br>protein 4       | CLIC4  | Q9Y696 | 1381.558 | DEFTNTcPSDK                       | C7  | 1.444 | 2.203 |
| Chloride intracellular channel<br>protein 4       | CLIC4  | Q9Y696 | 1749.752 | AGSDGESIGNc<br>PFSQR              | C11 | 1.296 | 1.203 |
| Chloride intracellular channel<br>protein 4       | CLIC4  | Q9Y696 | 2023.990 | FLDGNEMTLA<br>DeNLLPK             | C12 | 2.870 | -     |
| Chloride intracellular channel<br>protein 5       | CLIC5  | Q9NZA1 | 1780.846 | AGIDGESIGNc<br>PFSQR              | C11 | 1.348 | -     |
| Clathrin heavy chain 1                            | CLTC   | Q00610 | 1142.605 | AHIAQLcEK                         | C7  | 1.175 | -     |
| Clathrin heavy chain 1                            | CLTC   | Q00610 | 1237.480 | ESNcYDPER                         | C4  | 0.981 | 1.619 |
| Clathrin heavy chain 1                            | CLTC   | Q00610 | 1398.648 | DPHLAcVAYE<br>R                   | C6  | 1.144 | -     |
| Clathrin heavy chain 1                            | CLTC   | Q00610 | 1460.795 | QNLQLcVQVA<br>SK                  | C6  | 1.455 | 1.499 |
| Clathrin heavy chain 1                            | CLTC   | Q00610 | 1475.736 | cNEPAVWSQL<br>AK                  | C1  | 0.656 | -     |
| Clathrin heavy chain 1                            | CLTC   | Q00610 | 1591.806 | HSSLAGcQIIN<br>YR                 | C7  | 1.154 | 1.307 |
| Clathrin heavy chain 1                            | CLTC   | Q00610 | 1628.913 | LTDQLPLIIVcD<br>R                 | C11 | -     | -     |
| Coatomer subunit alpha                            | COPA   | P53621 | 1496.822 | LQLcYQLTTVG<br>K                  | C4  | 2.140 | -     |
| Coatomer subunit alpha                            | COPA   | P53621 | 1730.825 | GHYNNVScAV<br>FHPR                | C8  | -     | -     |
| Coatomer subunit alpha                            | COPA   | P53621 | 2205.053 | TTYQALPcLPS<br>MYGYPNR            | C8  | 1.840 | 2.807 |
| Coatomer subunit beta'                            | COPB2  | P35606 | 1063.579 | VWcVASLR                          | C3  | 1.959 | -     |
| Coatomer subunit delta                            | ARCN1  | P48444 | 893.494  | ITLTcGR                           | C5  | 1.511 | -     |
| Coatomer subunit delta                            | ARCN1  | P48444 | 1212.611 | NYcNIQVTK                         | C3  | 0.937 | -     |
| Coatomer subunit gamma-1                          | COPG1  | Q9Y678 | 1325.550 | cVMDDDNEVR                        | C1  | 3.268 | -     |
| Coatomer subunit gamma-1                          | COPG1  | Q9Y678 | 2095.097 | SLPYNQPGTcY<br>TLVALPK            | C10 | -     | -     |
| Cofilin-1                                         | CFL1   | P23528 | 1254.647 | AVLFCcLSEDK                       | C5  | -     | 1.953 |
| Cofilin-1                                         | CFL1   | P23528 | 1592.746 | HELQANcYEE<br>VK                  | C7  | -     | -     |
| Collagen alpha-1(I) chain                         | COL1A1 | P02452 | 2152.997 | SGEYWIDPNQ<br>GcNLDAIK            | C12 | 4.440 | -     |
| Collagen alpha-2(I) chain                         | COL1A2 | P08123 | 1462.730 | FTYTVLVDGcS<br>K                  | C10 | -     | -     |
| Collagen alpha-2(I) chain                         | COL1A2 | P08123 | 3028.375 | LSHPEWSSGY<br>YWIDPNQGcT<br>MDAIK | C19 | -     | -     |
| Collagen alpha-2(VI) chain                        | COL6A2 | P12110 | 2247.091 | HESENLYSIAc<br>DKPQQVR            | C11 | -     | -     |
| Connective tissue growth<br>factor                | CTGF   | P29279 | 1258.631 | LPSDcPFPR                         | C6  | -     | -     |
| Coronin-1B                                        | CORO1B | Q9BR76 | 1592.740 | VTWDSTFcAV<br>NPK                 | C8  | 0.860 | 0.321 |
| Coronin-1C                                        | CORO1C | Q9ULV4 | 1223.539 | DTIcNQDER                         | C4  | 1.049 | 1.178 |
| Coronin-1C                                        | CORO1C | Q9ULV4 | 1271.538 | NDQcYDDIR                         | C4  | 1.382 | -     |

|                                                                                    |         |        |          |                                       |     |            |       |
|------------------------------------------------------------------------------------|---------|--------|----------|---------------------------------------|-----|------------|-------|
| Coronin-1C                                                                         | CORO1C  | Q9ULV4 | 1611.761 | VTWDSSFcAV<br>NPR                     | C8  | 1.002      | 1.157 |
| C-type mannose receptor 2                                                          | MRC2    | Q9UBG0 | 1536.726 | cFQVQGQEPQS<br>R                      | C1  | 2.648      | -     |
| C-type mannose receptor 2                                                          | MRC2    | Q9UBG0 | 2335.129 | ISYHGScPQGL<br>ADSAWIPFR              | C7  | -          | -     |
| Cullin-associated NEDD8-<br>dissociated protein 1                                  | CAND1   | Q86VP6 | 1368.736 | TYIQcIAAISR                           | C5  | -          | -     |
| Cysteine and glycine-rich<br>protein 1                                             | CSRP1   | P21291 | 957.441  | DGELYcK                               | C6  | 1.939      | 1.859 |
| Cysteine and glycine-rich<br>protein 1                                             | CSRP1   | P21291 | 1199.578 | cSQAVYAAEK                            | C1  | 2.588      | 2.441 |
| Cysteine and glycine-rich<br>protein 2                                             | CSRP2   | Q16527 | 1172.530 | cGDSVYAAEK                            | C1  | 1.769      | -     |
| Cysteine and glycine-rich<br>protein 2                                             | CSRP2   | Q16527 | 1636.742 | TVYHAEVQc<br>DGR                      | C10 | 1.625      | 1.321 |
| Cysteine-rich protein 2                                                            | CRIP2   | P06733 | 1701.850 | VNQIGSVTESI<br>QAcK                   | C14 | 1.422      | 0.853 |
| Cysteine-rich protein 2                                                            | CRIP2   | P52943 | 1797.850 | ASSVTTFTEGEP<br>NTcPR                 | C14 | 3.008      | 2.115 |
| Cytochrome b-c1 complex<br>subunit 1, mitochondrial                                | UQCRC1  | P31930 | 1391.650 | LcTSATESEVA<br>R                      | C2  | 1.526      | -     |
| Cytochrome b-c1 complex<br>subunit 2, mitochondrial                                | UQCRC2  | P22695 | 1639.796 | NALANPLYcPD<br>YR                     | C9  | 1.509      | 4.165 |
| Cytoplasmic dynein 1 heavy<br>chain 1                                              | DYNC1H1 | Q14204 | 1192.579 | LQGATcNNNK                            | C6  | 1.030      | 0.922 |
| Cytoplasmic dynein 1 heavy<br>chain 1                                              | DYNC1H1 | Q14204 | 1281.631 | VQYPQSQAcK                            | C9  | 1.783      | -     |
| Cytoplasmic dynein 1 heavy<br>chain 1                                              | DYNC1H1 | Q14204 | 1529.754 | cYLTMQALE<br>AR                       | C1  | 3.004      | -     |
| Cytoskeleton-associated<br>protein 4                                               | CKAP4   | Q07065 | 2162.963 | SSSSSSASAAA<br>AAAAASSSASc<br>SR      | C22 | 1.382      | 0.571 |
| Cytosol aminopeptidase                                                             | LAP3    | P28838 | 843.416  | AAVAAGcR                              | C7  | 0.773      | -     |
| Cytosol aminopeptidase                                                             | LAP3    | P28838 | 1761.853 | ADMGGAATc<br>SAIVSAAK                 | C10 | -          | -     |
| D-3-phosphoglycerate<br>dehydrogenase                                              | PHGDH   | O43175 | 2121.078 | ALVDHENVISc<br>PHLGASTK               | C11 | -          | -     |
| Decorin                                                                            | DCN     | P07585 | 1593.774 | DFEPSLGPVcP<br>FR                     | C10 | -          | 3.059 |
| Desmoplakin                                                                        | DSP     | P15924 | 1334.653 | NQcTQVVQER                            | C3  | -          | -     |
| Dextrin                                                                            | DSTN    | P60981 | 1196.641 | AVIFcLSADK                            | C5  | 0.400      | -     |
| Dextrin                                                                            | DSTN    | P60981 | 1612.719 | HEcQANGPED<br>LNR                     | C3  | 0.968      | 0.860 |
| Dihydrolipoyl<br>dehydrogenase,<br>mitochondrial                                   | DLD     | P09622 | 1597.796 | VcHAHPTLSEA<br>FR                     | C2  | -          | 1.498 |
| Dihydropyrimidinase-related<br>protein 2                                           | DPYSL2  | Q16555 | 1688.823 | GLYDGPVcEVS<br>VTPK                   | C8  | 0.868      | -     |
| Dihydropyrimidinase-related<br>protein 2                                           | DPYSL2  | Q16555 | 1888.987 | AITIANQTNcPL<br>YITK                  | C10 | 0.450      | 3.128 |
| DNA-(apurinic or<br>apyrimidinic site) lyase                                       | APEX1   | P27695 | 1292.646 | IcSWNVdGLR                            | C2  | -          | -     |
| Dolichyl-<br>diphosphooligosaccharide-<br>protein glycosyltransferase<br>subunit 1 | RPN1    | P04843 | 1125.488 | TEGSDLcDR                             | C7  | -          | -     |
| Ectonucleotide<br>pyrophosphatase/phosphodies<br>terase family member 1            | ENPP1   | P22413 | 1306.575 | TDNSEScVHGK                           | C7  | 12.70<br>6 | -     |
| Electron transfer flavoprotein<br>subunit alpha, mitochondrial                     | ETFA    | P13804 | 1363.736 | LGGEVScLVA<br>GTK                     | C7  | 1.240      | 1.556 |
| Elongation factor 1-alpha 1                                                        | EEF1A1  | P68104 | 3068.462 | SGDAAIVDMV<br>PGKPMcVESFS<br>DYPLGR   | C16 | 1.592      | -     |
| Elongation factor 1-alpha 1                                                        | EEF1A1  | P68104 | 3094.631 | DGNASGTTLL<br>EALDcILPPTRP<br>TDKPLR  | C15 | -          | -     |
| Elongation factor 1-alpha 1                                                        | EEF1A1  | P68104 | 3222.723 | KDGNASGTTL<br>LEALDcILPPTR<br>PTDKPLR | C16 | -          | -     |
| Elongation factor 1-gamma                                                          | EEF1G   | P26641 | 1677.823 | WFLTcINQPQF<br>R                      | C5  | 1.392      | 1.657 |
| Elongation factor 2                                                                | EEF2    | P13639 | 1191.593 | STLTDSLvcK                            | C9  | -          | 1.250 |
| Elongation factor 2                                                                | EEF2    | P13639 | 1281.563 | EGALcEENMR                            | C5  | 2.859      | -     |
| Elongation factor 2                                                                | EEF2    | P13639 | 1451.775 | cLYASVLTAQP<br>R                      | C1  | 1.754      | 1.266 |
| Elongation factor 2                                                                | EEF2    | P13639 | 1507.713 | DLEEDHAcIPIK                          | C8  | 1.273      | 1.152 |

|                                                         |         |        |          |                                    |                   |       |       |
|---------------------------------------------------------|---------|--------|----------|------------------------------------|-------------------|-------|-------|
| Elongation factor 2                                     | EEF2    | P13639 | 1562.829 | TFcQLILDPIFK                       | C3                | 2.099 | 1.734 |
| Elongation factor 2                                     | EEF2    | P13639 | 1667.822 | ETVSEESNVLc<br>LSK                 | C11               | 2.015 | -     |
| Elongation factor 2                                     | EEF2    | P13639 | 2080.963 | cELLYEGPPDD<br>EAAMGIK             | C1                | 2.570 | 2.498 |
| Elongation factor 2                                     | EEF2    | P13639 | 2178.098 | IWcFGPDGTGP<br>NILTDITK            | C3                | 1.933 | 1.349 |
| Elongation factor 2                                     | EEF2    | P13639 | 2832.496 | YVEPIEDVPcG<br>NIVGLVGVDQ<br>FLVK  | C10               | 1.718 | 1.424 |
| Elongation factor 2                                     | EEF2    | P13639 | 3062.619 | LMEPIYLVEIQ<br>cPEQVVGGIYG<br>VLNR | C12               | -     | -     |
| Endoplasmic reticulum<br>resident protein 44            | ERP44   | Q9BS26 | 1516.686 | VDcDQHSDIAQ<br>R                   | C3                | 1.884 | -     |
| Endoplasmic<br>reticulum protein 44                     | HSP90B1 | P14625 | 2429.133 | LTESPcALVAS<br>QYGWSGNME<br>R      | C6                | 1.399 | 1.897 |
| Endosialin                                              | CD248   | Q9HCU0 | 1151.588 | GSLTGVQTcR                         | C9                | -     | -     |
| Endosialin                                              | CD248   | Q9HCU0 | 1296.604 | cVALEASGEHR                        | C1                | -     | -     |
| Eukaryotic translation<br>initiation factor 2 subunit 1 | EIF2S1  | P05198 | 1507.731 | AGLNcSTENM<br>PIK                  | C5                | 1.584 | -     |
| Eukaryotic translation<br>initiation factor 2 subunit 3 | EIF2S3  | P41091 | 1968.889 | ScGSSTPDEFPT<br>DIPGTK             | C2                | -     | -     |
| Eukaryotic translation<br>initiation factor 3 subunit 1 | EIF3I   | Q13347 | 1389.662 | HVLTGSADNSc<br>R                   | C11               | -     | -     |
| Eukaryotic translation<br>initiation factor 6           | EIF6    | P56537 | 2616.317 | LSALGNVTcN<br>DYVALVHPDL<br>DR     | C10               | 1.620 | -     |
| Extended synaptotagmin-1                                | ESYT1   | Q9BSJ8 | 1137.536 | LGTQTFcSR                          | C7                | 1.196 | 0.840 |
| Extracellular matrix protein 1                          | ECM1    | Q16610 | 1373.690 | LTFINDLcGPR                        | C8                | -     | -     |
| Far upstream element-<br>binding protein 1              | FUBP1   | Q96AE4 | 1612.850 | cQHAAEIITDL<br>LR                  | C1                | 2.745 | -     |
| Fascin                                                  | FSCN1   | Q16658 | 1018.426 | DGNVTcER                           | C6                | 1.648 | 1.826 |
| Fascin                                                  | FSCN1   | Q16658 | 1100.494 | GEHGFIGcR                          | C8                | 1.429 | -     |
| Fascin                                                  | FSCN1   | Q16658 | 1505.731 | LScFAQTVSPA<br>EK                  | C3                | 2.104 | -     |
| Fascin                                                  | FSCN1   | Q16658 | 1684.801 | YLAADKDGNV<br>TcER                 | C12               | 1.855 | -     |
| Fatty acid synthase                                     | FASN    | P49327 | 1481.784 | LSIPTYGLQcT<br>R                   | C10               | -     | 1.637 |
| Fatty acid synthase                                     | FASN    | P49327 | 2740.387 | cVLLSNLSSTS<br>HVPEVDPGSA<br>ELQK  | C1                | -     | -     |
| Fibrillin-1                                             | FBN1    | P35555 | 879.441  | VGcVDTR                            | C3                | -     | 3.824 |
| Fibrillin-1                                             | FBN1    | P35555 | 1258.554 | FTSTGQcNDR                         | C7                | 1.684 | 4.882 |
| Fibrillin-1                                             | FBN1    | P35555 | 1348.696 | cSNQLPQSITK                        | C1                | -     | -     |
| Fibronectin                                             | FN1     | P02751 | 1069.498 | cTcVGNGR                           | C1;<br>C3         | 2.565 | 2.191 |
| Fibronectin                                             | FN1     | P02751 | 1294.580 | TFYScTTEGR                         | C5                | 1.595 | 2.413 |
| Fibronectin                                             | FN1     | P02751 | 1556.760 | GEWTcIAYSQ<br>L                    | C5                | 1.888 | 2.639 |
| Fibronectin                                             | FN1     | P02751 | 1608.805 | GNLLQcLcTGN<br>GR                  | C6;<br>C8         | -     | -     |
| Fibronectin                                             | FN1     | P02751 | 1654.681 | WcGTTQNYDA<br>DQK                  | C2                | 1.469 | 2.510 |
| Fibronectin                                             | FN1     | P02751 | 1713.686 | cDPHEATcYDD<br>GK                  | C1;<br>C8         | -     | -     |
| Fibronectin                                             | FN1     | P02751 | 1787.797 | DSMIWDCcTcIG<br>AGR                | C7;<br>C9         | -     | 3.047 |
| Fibronectin                                             | FN1     | P02751 | 1799.885 | YSFcTDHTVLV<br>QTR                 | C4                | 1.448 | 2.333 |
| Fibronectin                                             | FN1     | P02751 | 1927.874 | TYLGNALVcTc<br>YGGSR               | C9;<br>C11        | 1.104 | 2.640 |
| Fibronectin                                             | FN1     | P02751 | 2097.960 | EYLGAIcScTcF<br>GGQR               | C7;<br>C9;<br>C11 | -     | -     |
| Fibulin-2                                               | FBLN2   | P98095 | 911.478  | NPLcAR                             | C5                | 0.994 | -     |
| Fibulin-2                                               | FBLN2   | P98095 | 1066.543 | ScMAGVLGAK                         | C2                | -     | -     |
| Fibulin-2                                               | FBLN2   | P98095 | 2312.152 | TcRPEGHPPQP<br>EAPQEPALK           | C2                | -     | -     |
| Filamin-A                                               | FLNA    | P21333 | 938.405  | GDGScDVR                           | C5                | -     | -     |
| Filamin-A                                               | FLNA    | P21333 | 943.431  | cSGPLER                            | C1                | 1.540 | 0.936 |

|           |      |        |          |                                        |                 |       |       |
|-----------|------|--------|----------|----------------------------------------|-----------------|-------|-------|
| Filamin-A | FLNA | P21333 | 1103.507 | SSFTVDcSK                              | C7              | 1.941 | -     |
| Filamin-A | FLNA | P21333 | 1161.625 | TPcEEILVK                              | C3              | 1.212 | 1.300 |
| Filamin-A | FLNA | P21333 | 1223.645 | IVGPSGAAVpK                            | C11             | 1.559 | -     |
| Filamin-A | FLNA | P21333 | 1290.634 | cSGPGLSPGMV<br>R                       | C1              | 2.346 | 2.228 |
| Filamin-A | FLNA | P21333 | 1303.655 | AHVVPcFDAS<br>K                        | C6              | -     | 1.381 |
| Filamin-A | FLNA | P21333 | 1657.690 | DNGNGTYScS<br>YVPR                     | C9              | 1.170 | 1.544 |
| Filamin-A | FLNA | P21333 | 1709.770 | VDINTEDLEDG<br>TcR                     | C13             | -     | -     |
| Filamin-A | FLNA | P21333 | 1852.913 | VQVQDNEGcP<br>VEALVK                   | C9              | 1.656 | 2.343 |
| Filamin-A | FLNA | P21333 | 1862.885 | ATcAPQHGAP<br>GPGPADASK                | C3              | 1.582 | 1.528 |
| Filamin-A | FLNA | P21333 | 1955.000 | VTYcPTEPGNY<br>IINIK                   | C4              | 1.169 | 1.795 |
| Filamin-A | FLNA | P21333 | 2088.049 | cAPGVVGAPE<br>ADIDFDIIR                | C1              | 2.144 | -     |
| Filamin-A | FLNA | P21333 | 2125.956 | THEAEIVEGEN<br>HTYcIR                  | C15             | 1.760 | -     |
| Filamin-A | FLNA | P21333 | 2331.086 | DGScGVAYVV<br>QEPGDYEVS<br>K           | C4              | -     | -     |
| Filamin-A | FLNA | P21333 | 2350.089 | VHSPSGALEEc<br>YVTEIDQDK               | C11             | -     | -     |
| Filamin-A | FLNA | P21333 | 2609.209 | YWPQEAGEYA<br>VHVLcNSEDIR              | C15             | -     | 0.812 |
| Filamin-A | FLNA | P21333 | 2756.374 | cSYQPTMEGV<br>HTVHVTFAGV<br>PIPR       | C1              | 1.708 | 1.965 |
| Filamin-A | FLNA | P21333 | 2836.401 | LQVEPAVDTS<br>GVQcYGP<br>GIEG<br>QGVFR | C14             | 1.512 | 1.224 |
| Filamin-B | FLNB | O75369 | 1271.607 | VAVTEGcQPSR                            | C7              | 0.606 | -     |
| Filamin-B | FLNB | O75369 | 1565.710 | MDGTYAcSYT<br>PVK                      | C7              | -     | -     |
| Filamin-B | FLNB | O75369 | 1690.750 | VDIQTEDLEDG<br>TcK                     | C13             | 0.504 | -     |
| Filamin-B | FLNB | O75369 | 1712.890 | APSVATVGSic<br>DLNLK                   | C11             | 0.718 | -     |
| Filamin-B | FLNB | O75369 | 1729.744 | IEYNDQNDGSc<br>DVK                     | C11             | -     | -     |
| Filamin-B | FLNB | O75369 | 1746.873 | GAGTGGLGLT<br>VEGPcEAK                 | C15             | -     | -     |
| Filamin-C | FLNC | Q14315 | 1098.537 | cSGPGLGAGV<br>R                        | C1              | 1.224 | 1.316 |
| Filamin-C | FLNC | Q14315 | 1197.587 | TPcEEVYVK                              | C3              | -     | -     |
| Filamin-C | FLNC | Q14315 | 1263.603 | VGVTEGcDPTR                            | C7              | -     | 1.176 |
| Filamin-C | FLNC | Q14315 | 1265.698 | cSYVPTKPIK                             | C1              | 0.696 | 1.083 |
| Filamin-C | FLNC | Q14315 | 1387.693 | APSGNEEPcLL<br>K                       | C9              | 1.930 | 1.518 |
| Filamin-C | FLNC | Q14315 | 1638.797 | VPQTFTVDcSQ<br>AGR                     | C9              | 0.890 | 0.927 |
| Filamin-C | FLNC | Q14315 | 1651.806 | LYAQDADGcPI<br>DIK                     | C9              | 0.792 | -     |
| Filamin-C | FLNC | Q14315 | 1856.945 | QAPSIATIGSTc<br>DLNLK                  | C12             | 0.953 | 1.184 |
| Filamin-C | FLNC | Q14315 | 1865.937 | ARVPQTFTVDc<br>SQAGR                   | C11             | 0.802 | -     |
| Filamin-C | FLNC | Q14315 | 1936.976 | VTYcPTEPGTY<br>IINIK                   | C4              | 0.731 | 0.448 |
| Filamin-C | FLNC | Q14315 | 2077.917 | SPFPVHVSEAc<br>NPNAcR                  | C11<br>;<br>C16 | -     | 1.115 |
| Filamin-C | FLNC | Q14315 | 2083.930 | EAGDGVFEcE<br>YYPVVPK                  | C9              | 1.271 | 0.638 |
| Filamin-C | FLNC | Q14315 | 2295.050 | VHTPSGAVEEc<br>YVSELDSDK               | C11             | 1.591 | -     |
| Filamin-C | FLNC | Q14315 | 2356.069 | DGScGVSYVV<br>QEPGDYEVS<br>IK          | C4              | 0.987 | -     |
| Filamin-C | FLNC | Q14315 | 2358.169 | DGTcTVSYLPT<br>APGDYSIIVR              | C4              | 0.924 | 1.551 |
| Filamin-C | FLNC | Q14315 | 2628.280 | EcPEGHVVTYT<br>PMAPGNYLIAI<br>K        | C2              | -     | -     |



|                                                                  |         |        |          |                                     |            |       |       |
|------------------------------------------------------------------|---------|--------|----------|-------------------------------------|------------|-------|-------|
| Filamin-C                                                        | FLNC    | Q14315 | 2712.357 | cTYRPAMEGP<br>HTVHVAFAGA<br>PITR    | C1         | 0.901 | 1.125 |
| Four and a half LIM domains protein 1                            | FHL1    | Q13642 | 1241.557 | FWHDTcFR                            | C6         | -     | 3.392 |
| Four and a half LIM domains protein 1                            | FHL1    | Q13642 | 1572.826 | cLHPLANETFV<br>AK                   | C1         | -     | -     |
| Four and a half LIM domains protein 2                            | FHL2    | Q14192 | 964.530  | cSLSLVGR                            | C1         | 0.881 | -     |
| Four and a half LIM domains protein 2                            | FHL2    | Q14192 | 1796.791 | FDcHHcNESLF<br>GK                   | C3;<br>C6  | -     | 1.011 |
| Fructose-bisphosphate aldolase A                                 | ALDOA   | P04075 | 1000.482 | cQYVTEK                             | C1         | 1.509 | 1.068 |
| Fructose-bisphosphate aldolase A                                 | ALDOA   | P04075 | 1200.607 | ALANSLAcQG<br>K                     | C8         | 1.100 | 1.145 |
| Fructose-bisphosphate aldolase A                                 | ALDOA   | P04075 | 2161.151 | VNPcIGGVILF<br>HETLYQK              | C4         | -     | -     |
| Fructose-bisphosphate aldolase A                                 | ALDOA   | P04075 | 3093.560 | YASlCQQNGIV<br>PIVEPEILPDGD<br>HDLK | C5         | 1.157 | 0.965 |
| Galectin-1                                                       | LGALS1  | P09382 | 1554.712 | DSNNLcLHFNP<br>R                    | C6         | 1.595 | 0.721 |
| Galectin-1                                                       | LGALS1  | P09382 | 1715.779 | FNAHGdANTI<br>VcNSK                 | C12        | 1.407 | 1.202 |
| Galectin-1                                                       | LGALS1  | P09382 | 2935.457 | EAVFPFQPGSV<br>AEVcITFDQAN<br>LTVK  | C15        | -     | -     |
| GDP-fucose protein O-fucosyltransferase 1                        | POFUT1  | Q9H488 | 1386.691 | VAYcFEVAAQ<br>R                     | C4         | 1.105 | 0.738 |
| Glucosamine 6-phosphate N-acetyltransferase                      | GNPNAT1 | Q96EK6 | 1374.622 | VEDVVVSDc<br>R                      | C10        | -     | -     |
| Glucosidase 2 subunit beta                                       | PRKCSH  | P14314 | 1625.719 | YEQGTGcWQG<br>PNR                   | C7         | 1.467 | 1.491 |
| Glucosylceramidase                                               | GBA     | P04062 | 1355.645 | VPMAcDFSIR                          | C6         | -     | -     |
| Glutathione S-transferase P                                      | GSTP1   | P09211 | 1204.604 | AScLYGQLPK                          | C3         | 1.105 | 1.854 |
| Glyceraldehyde-3-phosphate dehydrogenase                         | GAPDH   | P04406 | 1603.853 | VPTANVSVVD<br>LTcR                  | C13        | -     | 0.706 |
| Glyceraldehyde-3-phosphate dehydrogenase                         | GAPDH   | P04406 | 1969.969 | IISNAcTTNcL<br>APLAK                | C7;<br>C11 | -     | -     |
| Glycine--tRNA ligase                                             | GARS    | P41250 | 1699.817 | TSYGWIEIVGc<br>ADR                  | C11        | 2.517 | 1.301 |
| Glycine--tRNA ligase                                             | GARS    | P41250 | 2097.061 | cSVLPLSQNQE<br>FMPFVK               | C1         | 1.477 | -     |
| Glycogen phosphorylase, brain form                               | PYGB    | P11216 | 1915.047 | WLLcNPGLA<br>DTIVEK                 | C5         | -     | -     |
| Golgi apparatus protein 1                                        | GLG1    | Q92896 | 1074.542 | cNVENLPR                            | C1         | 2.267 | -     |
| Golgi apparatus protein 1                                        | GLG1    | Q92896 | 1295.600 | LSSDcEDQIR                          | C5         | 1.358 | 0.480 |
| Golgi apparatus protein 1                                        | GLG1    | Q92896 | 1341.590 | FcENTQAGEGR                         | C2         | 2.343 | 2.481 |
| Guanine nucleotide-binding protein G(i) subunit alpha-2          | GNAI2   | P04899 | 1183.583 | LFDSlCnNK                           | C6         | -     | 1.307 |
| Guanine nucleotide-binding protein G(i) subunit alpha-2          | GNAI2   | P04899 | 1589.768 | LWADHGVQAc<br>FGR                   | C10        | -     | -     |
| Guanine nucleotide-binding protein G(i) subunit alpha-2          | GNAI2   | P04899 | 2117.039 | ITHSPLTlCfPE<br>YTGANK              | C9         | 1.135 | -     |
| Guanine nucleotide-binding protein G(I)/G(S)/G(T) subunit beta-1 | GNB1    | P62873 | 1298.647 | LFVSGAcDASA<br>K                    | C7         | -     | -     |
| Guanine nucleotide-binding protein G(I)/G(S)/G(T) subunit beta-1 | GNB1    | P62873 | 2084.013 | AcADATLSQIT<br>NNIDPVGR             | C2         | 1.930 | 1.404 |
| Guanine nucleotide-binding protein G(I)/G(S)/G(T) subunit beta-1 | GNB1    | P62873 | 2489.189 | VScLGVTTDDG<br>MAVATGSWD<br>SFLK    | C3         | -     | -     |
| Guanine nucleotide-binding protein G(I)/G(S)/G(T) subunit beta-2 | GNB2    | P62879 | 1323.628 | TFVSGAcDASI<br>K                    | C7         | 1.412 | 1.839 |
| Guanine nucleotide-binding protein G(I)/G(S)/G(T) subunit beta-2 | GNB2    | P62879 | 1999.979 | AcGDSTLTQIT<br>AGLDPVGR             | C2         | -     | -     |
| Guanine nucleotide-binding protein G(k) subunit alpha            | GNAI3   | P08754 | 1169.542 | DGGVQAcFSR                          | C7         | -     | -     |
| Guanine nucleotide-binding protein subunit beta-4                | GNB4    | Q9HAV0 | 1297.574 | TFVSGAcDASS<br>K                    | C7         | -     | 1.650 |
| Heat shock 70 kDa protein 4                                      | HSPA4   | P34932 | 1454.720 | FLEMcNDLLA<br>R                     | C5         | -     | -     |
| Heat shock 70 kDa protein 4                                      | HSPA4   | P34932 | 1721.876 | SVMDATQIAG<br>LNeLR                 | C13        | 2.488 | 0.822 |
| Heat shock cognate 71 kDa                                        | HSPA8   | P11142 | 1012.550 | VcNPIITK                            | C2         | -     | 1.756 |

|                                                          |               |        |          |                                  |                  |       |       |
|----------------------------------------------------------|---------------|--------|----------|----------------------------------|------------------|-------|-------|
| protein                                                  |               |        |          |                                  |                  |       |       |
| Heat shock cognate 71 kDa protein                        | HSPA8         | P11142 | 1377.691 | cNEIINWLDK                       | C1               | 1.262 | -     |
| Heat shock protein 105 kDa                               | HSPH1         | Q92598 | 1701.940 | SVLDAAQIVG<br>LNcLR              | C13              | 1.612 | -     |
| Heat shock protein beta-7                                | HSPB7         | Q9UBY9 | 1960.970 | cQLPEDVDPTS<br>VTSALR            | C1               | 0.457 | -     |
| Heterogeneous nuclear ribonucleoprotein A/B              | HNRNPAB       | Q99729 | 1240.628 | FGEVVDcTLK                       | C7               | 0.539 | -     |
| Heterogeneous nuclear ribonucleoprotein A1-like 2        | HNRNPA1<br>L2 | Q32P51 | 2038.943 | SHFEQWGTLT<br>DcVVMR             | C12              | -     | -     |
| Heterogeneous nuclear ribonucleoprotein A3               | HNRNPA3       | P51991 | 1410.692 | WGTLTDcVVM<br>R                  | C7               | 1.636 | 1.421 |
| Heterogeneous nuclear ribonucleoprotein H                | HNRNPH1       | P31943 | 1577.745 | GLPWScSADE<br>VQR                | C6               | -     | -     |
| Heterogeneous nuclear ribonucleoprotein H2               | HNRNPH2       | P55795 | 1580.727 | GLPWScSADE<br>VMR                | C6               | 3.230 | -     |
| Heterogeneous nuclear ribonucleoprotein U                | HNRNPU        | Q00839 | 1202.583 | McLFAGFQR                        | C2               | -     | -     |
| Heterogeneous nuclear ribonucleoproteins A2/B1           | HNRNPA2<br>B1 | P22626 | 1066.544 | LTDeVVMR                         | C4               | -     | -     |
| Hexokinase-1                                             | HK1           | P19367 | 1529.747 | AAQLcGAGMA<br>AVVDK              | C5               | -     | -     |
| High mobility group protein B2                           | HMGB2         | P26583 | 1569.723 | MSSYAFFVQTc<br>R                 | C11              | -     | -     |
| Histidine triad nucleotide-binding protein 1             | HINT1         | P49773 | 2359.228 | cLAFHDISPQA<br>PTHFLVIPK         | C1               | 1.267 | 1.266 |
| HLA class I histocompatibility antigen, B-37 alpha chain | HLA-B         | P18463 | 1569.777 | AYLEGTcVEW<br>LR                 | C7               | -     | 2.864 |
| Importin-5                                               | IPO5          | O00410 | 1185.596 | VcDIAAELAR                       | C2               | -     | -     |
| Importin-5                                               | IPO5          | O00410 | 1698.861 | VAAAESMPLL<br>LEcAR              | C13              | 0.504 | -     |
| Inactive tyrosine-protein kinase 7                       | PTK7          | Q13308 | 1454.712 | LQDSGTFQcVA<br>R                 | C9               | -     | -     |
| Inosine-5'-monophosphate dehydrogenase 2                 | IMPDH2        | P12268 | 1503.744 | HGFcGIPITDTG<br>R                | C4               | 1.509 | -     |
| Integrin beta-1                                          | ITGB1         | P05556 | 1471.667 | SNGLIcGGNGV<br>cK                | C6;<br>C12       | -     | -     |
| Integrin beta-1                                          | ITGB1         | P05556 | 1755.702 | FcEcDNFNcDR                      | C2;<br>C4;<br>C9 | -     | -     |
| Interphotoreceptor matrix proteoglycan 1                 | IMPG1         | Q17R60 | 2509.177 | CKPGYDSQGS<br>LDGLEPGLcGP<br>GTK | C19              | -     | -     |
| Isoleucine--tRNA ligase, cytoplasmic                     | IARS          | P41252 | 1235.594 | VcMDFNIIR                        | C2               | 1.534 | 2.449 |
| Keratin, type II cytoskeletal 1                          | KRT1          | P04264 | 1833.758 | FSScGGGGGSF<br>GAGGGFGSR         | C4               | -     | 0.683 |
| Lactotransferrin                                         | LTF           | P02788 | 1430.739 | cGLVPVLAEN<br>YK                 | C1               | -     | -     |
| Leucine-rich PPR motif-containing protein, mitochondrial | LRPPRC        | P42704 | 1477.734 | cVANNQVETL<br>EK                 | C1               | -     | -     |
| Leucine-rich repeat-containing protein 15                | LRRC15        | Q8TF66 | 1151.551 | ASQVEcTGAR                       | C6               | 1.367 | 0.571 |
| Leucine-rich repeat-containing protein 15                | LRRC15        | Q8TF66 | 1805.927 | LGTDTVPVcFS<br>PANVR             | C9               | 0.365 | -     |
| Leupaxin                                                 | LPXN          | O60711 | 2097.984 | SGLAYcPNDY<br>HQLFSR             | C6               | -     | 0.699 |
| LIM domain only protein 7                                | LMO7          | Q8WW11 | 1412.710 | SLTScSSDITLR                     | C5               | -     | -     |
| L-lactate dehydrogenase A chain                          | LDHA          | P00338 | 1316.628 | VIGSGcNLDSA<br>R                 | C6               | 0.880 | 0.849 |
| L-lactate dehydrogenase A chain                          | LDHA          | P00338 | 2362.237 | DDVFLSVPcIL<br>GQNGISDLVK        | C9               | 0.836 | 0.931 |
| Lupus La protein                                         | SSB           | P05455 | 1381.569 | FSGDLDDQTcR                      | C10              | -     | -     |
| Lysosome-associated membrane glycoprotein 1              | LAMP1         | P11279 | 1087.501 | cNAEEHVR                         | C1               | 1.538 | 1.590 |
| Macrophage migration inhibitory factor                   | MIF           | P14174 | 1112.615 | LLcGLLAER                        | C3               | 0.844 | 1.449 |
| Major vault protein                                      | MVP           | Q14764 | 1371.640 | HYcTVANPVS<br>R                  | C3               | 1.110 | 1.269 |
| Malate dehydrogenase, cytoplasmic                        | MDH1          | P40925 | 1830.981 | VIVVGNPANT<br>NcLTASK            | C12              | -     | -     |
| Malate dehydrogenase, mitochondrial                      | MDH2          | P40926 | 1221.581 | EGVVEcSFVK                       | C6               | 1.616 | -     |
| Mesencephalic astrocyte-derived neurotrophic factor      | MANF          | P55145 | 1629.748 | LcYYIGATDDA<br>ATK               | C2               | -     | 1.652 |

|                                                             |         |        |          |                                     |     |       |       |
|-------------------------------------------------------------|---------|--------|----------|-------------------------------------|-----|-------|-------|
| Methionine--tRNA ligase, cytoplasmic                        | MARS    | P56192 | 1972.077 | LFVSDGVPGeL<br>PVLAAAGR             | C10 | 1.739 | -     |
| Mitochondrial 10-formyltetrahydrofolate dehydrogenase       | ALDH1L2 | Q3SY69 | 1940.875 | ScDVEPNdTVD<br>ALYNR                | C2  | -     | -     |
| Mitochondrial antiviral-signaling protein                   | MAVS    | Q7Z434 | 1047.488 | ATcTLSGNR                           | C3  | -     | 1.358 |
| Mitochondrial-processing peptidase subunit beta             | PMPCB   | O75439 | 1424.714 | LcTSVTESEVA<br>R                    | C2  | 1.719 | -     |
| Moesin                                                      | MSN     | P26038 | 1793.885 | ILALcMGNHEL<br>YMR                  | C5  | -     | -     |
| Muscleblind-like protein 2                                  | MBNL2   | Q5VZF2 | 1022.474 | ScQVENGR                            | C2  | 1.534 | -     |
| Myoferlin                                                   | MYOF    | Q9NZM1 | 1027.468 | cYVYQAR                             | C1  | -     | 1.232 |
| Myoferlin                                                   | MYOF    | Q9NZM1 | 1161.559 | VHVcGQTHR                           | C4  | 1.096 | -     |
| Myoferlin                                                   | MYOF    | Q9NZM1 | 1602.788 | ELPDSVPQEcT<br>VR                   | C10 | 1.103 | -     |
| Myosin light chain kinase, smooth muscle                    | MYLK    | Q15746 | 1066.577 | FLLDcGIR                            | C5  | -     | -     |
| Myosin light chain kinase, smooth muscle                    | MYLK    | Q15746 | 1359.604 | YTcEATNGSG<br>AR                    | C3  | 1.740 | -     |
| Myosin light polypeptide 6                                  | MYL6    | P60660 | 1414.687 | ILYSQcGDVMR                         | C6  | 1.137 | -     |
| Myosin-9                                                    | MYH9    | P35579 | 1022.499 | QSAcNLEK                            | C4  | -     | 1.573 |
| Myosin-9                                                    | MYH9    | P35579 | 1081.511 | cQHLQAEK                            | C1  | 2.063 | 2.340 |
| Myosin-9                                                    | MYH9    | P35579 | 1090.574 | cNGVLEGIR                           | C1  | 2.233 | 1.570 |
| Myosin-9                                                    | MYH9    | P35579 | 1367.683 | ADFcIIHYAGK                         | C4  | -     | 1.326 |
| Myosin-9                                                    | MYH9    | P35579 | 1624.751 | EDQSILcTGES<br>GAGK                 | C7  | 1.532 | 1.396 |
| Myosin-9                                                    | MYH9    | P35579 | 1842.904 | KQELEEIcHDL<br>EAR                  | C8  | -     | -     |
| Myosin-9                                                    | MYH9    | P35579 | 2359.173 | VEDMAELTcL<br>NEASVLHNLK            | C9  | 1.150 | -     |
| NADH dehydrogenase [ubiquinone] 1 beta subcomplex subunit 7 | NDUFB7  | P17568 | 1390.564 | HDWDYcEHR                           | C6  | -     | 2.623 |
| NADH-cytochrome b5 reductase 3                              | CYB5R3  | P00387 | 2213.036 | DPDDHTVcHL<br>LFANQTEK              | C8  | 0.901 | -     |
| Nestin                                                      | NES     | P48681 | 1300.684 | VGLNAQAaA<br>PR                     | C9  | -     | 0.630 |
| Niban-like protein 1                                        | FAM129B | Q96TA1 | 1343.606 | HcNNGIPEDSK                         | C2  | 1.081 | -     |
| Non-POU domain-containing octamer-binding protein           | NONO    | Q15233 | 1321.674 | FAcHSASLTVR                         | C3  | 1.859 | 1.936 |
| Nuclear transport factor 2                                  | NUTF2   | P61970 | 1828.823 | NINDAWVcTN<br>DMFR                  | C8  | 2.243 | -     |
| Oligosaccharyltransferase complex subunit OSTC              | OSTC    | Q9NRP0 | 1496.825 | VPFLVLEcPNL<br>K                    | C8  | 1.753 | -     |
| Palladin                                                    | PALLD   | Q8WX93 | 1245.590 | NEAGIVScTAR                         | C8  | 1.905 | 1.050 |
| Palladin                                                    | PALLD   | Q8WX93 | 1427.705 | DAGIYTeIATN<br>R                    | C7  | 1.387 | 2.209 |
| PDZ and LIM domain protein 1                                | PDLIM1  | O00151 | 1393.722 | GeTDNLTlTVA<br>R                    | C2  | -     | -     |
| PDZ and LIM domain protein 4                                | PDLIM4  | P50479 | 1213.678 | cGHGIVGTIVK                         | C1  | -     | -     |
| PDZ and LIM domain protein 4                                | PDLIM4  | P50479 | 1741.934 | LGAPLSGLQG<br>LPEcTR                | C14 | 1.738 | -     |
| PDZ and LIM domain protein 7                                | PDLIM7  | Q9NR12 | 1718.721 | AFYMEEGVPY<br>cER                   | C11 | -     | 0.491 |
| Peptidyl-prolyl cis-trans isomerase A                       | PPIA    | P62937 | 1192.595 | ITIADcGQLE                          | C6  | 1.857 | -     |
| Peptidyl-prolyl cis-trans isomerase A                       | PPIA    | P62937 | 1671.800 | IIPGFMcQGGD<br>FTR                  | C7  | 1.976 | 1.607 |
| Peptidyl-prolyl cis-trans isomerase A                       | PPIA    | P62937 | 2859.358 | HTGPGILSMA<br>NAGPNTNGSQ<br>FFIcTAK | C24 | 0.836 | 1.387 |
| Peptidyl-prolyl cis-trans isomerase B                       | PPIB    | P23284 | 1063.549 | DVIIADcGK                           | C7  | -     | -     |
| Peptidyl-prolyl cis-trans isomerase FKBP10                  | FKBP10  | Q96AY3 | 1593.727 | GMDQGLLGMc<br>PGER                  | C10 | 3.072 | -     |
| Peptidyl-prolyl cis-trans isomerase FKBP10                  | FKBP10  | Q96AY3 | 1906.944 | VIEGLDTGLQG<br>McVGER               | C13 | 3.711 | 1.495 |
| Peptidyl-prolyl cis-trans isomerase-like 1                  | PPIL1   | Q9Y3C6 | 1206.612 | VcQGIGMVNR                          | C2  | -     | 2.070 |
| Perilipin-3                                                 | PLIN3   | O60664 | 2703.409 | DIAQQQLQATcT<br>SLGSSIQGLPT<br>NVK  | C10 | 1.461 | -     |
| Peroxiredoxin-6                                             | PRDX6   | P30041 | 1468.716 | DFTPVcTTELG<br>R                    | C6  | 5.471 | 0.675 |

|                                                                     |          |        |          |                                 |                        |       |       |
|---------------------------------------------------------------------|----------|--------|----------|---------------------------------|------------------------|-------|-------|
| Peroxiredoxin-6                                                     | PRDX6    | P30041 | 1650.695 | DINAYNcEEPT<br>EK               | C7                     | -     | -     |
| Persulfide dioxygenase<br>ETHE1, mitochondrial                      | ETHE1    | O95571 | 1389.757 | SLLPGcQSVISR                    | C6                     | 0.739 | -     |
| Phosphatidylethanolamine-<br>binding protein 1                      | PEBP1    | P30086 | 1171.541 | cDEPILSNR                       | C1                     | 1.992 | 1.437 |
| Phosphatidylethanolamine-<br>binding protein 1                      | PEBP1    | P30086 | 2137.957 | APVAGTcYQA<br>EWDDYVVK          | C7                     | 1.608 | 1.294 |
| Phosphoglycerate kinase 1                                           | PGK1     | P00558 | 1841.997 | AcANPAAGSVI<br>LLENLR           | C2                     | 1.005 | 1.221 |
| Phosphoglycerate kinase 1                                           | PGK1     | P00558 | 1973.961 | GcITIIGGGDTA<br>TccAK           | C2;<br>C14<br>;<br>C15 | -     | -     |
| Phosphoglycerate mutase 1                                           | PGAM1    | P18669 | 1941.915 | YADLTEDQLP<br>ScESLK            | C12                    | 0.995 | 1.263 |
| Phosphomevalonate kinase                                            | PMVK     | Q15126 | 1146.638 | LGADVcAVLR                      | C6                     | -     | -     |
| Phosphoserine<br>aminotransferase                                   | PSAT1    | Q9Y617 | 1500.720 | cADYVVTGAW<br>SAK               | C1                     | -     | -     |
| Plasma membrane calcium-<br>transporting ATPase 4                   | ATP2B4   | P23634 | 1481.643 | EGDFGcTVME<br>LR                | C6                     | 0.901 | -     |
| Plasma membrane calcium-<br>transporting ATPase 4                   | ATP2B4   | P23634 | 2218.112 | DALTQINVHY<br>GGVQNLeSR         | C17                    | -     | -     |
| Plasminogen activator<br>inhibitor 2                                | SERPINB2 | P05120 | 1308.680 | ITNcILFFGR                      | C4                     | -     | -     |
| Plastin-3                                                           | PLS3     | P13797 | 1104.613 | AVGDGIVLcK                      | C9                     | 0.864 | 1.223 |
| Platelet-activating factor<br>acetylhydrolase IB subunit<br>alpha   | PAFAH1B1 | P43034 | 2435.176 | MVRPNQDGTL<br>IAScSNDQTVR       | C14                    | 0.828 | -     |
| Plectin                                                             | PLEC     | Q15149 | 891.477  | LEcLQR                          | C3                     | 2.878 | -     |
| Plectin                                                             | PLEC     | Q15149 | 1068.552 | VPLDVAcAR                       | C7                     | 2.473 | -     |
| Plectin                                                             | PLEC     | Q15149 | 1134.473 | GcLDEETSR                       | C2                     | 3.574 | 2.825 |
| Plectin                                                             | PLEC     | Q15149 | 1171.522 | AFcGFEDPR                       | C3                     | 3.679 | -     |
| Plectin                                                             | PLEC     | Q15149 | 1248.595 | cVEDPETGLR                      | C1                     | 3.035 | -     |
| Plectin                                                             | PLEC     | Q15149 | 1264.703 | LPLLAVcDYK                      | C7                     | -     | 2.530 |
| Plectin                                                             | PLEC     | Q15149 | 2000.096 | cRPDQLTGLSL<br>LPLSEK           | C1                     | 4.819 | -     |
| Plectin                                                             | PLEC     | Q15149 | 2012.041 | TLLQSGcLAG<br>IYLEDTK           | C8                     | 3.072 | -     |
| Plectin                                                             | PLEC     | Q15149 | 2061.032 | LLEAQAcTGGI<br>IDPSTGER         | C7                     | 5.446 | -     |
| Podocalyxin                                                         | PODXL    | O00592 | 947.577  | LISLIcR                         | C6                     | 0.932 | -     |
| Poly(rC)-binding protein 1                                          | PCBP1    | Q15365 | 1361.653 | INISEGNcPER                     | C8                     | 1.308 | 1.235 |
| Poly(rC)-binding protein 1                                          | PCBP1    | Q15365 | 1510.832 | LVVPATQcGSL<br>IGK              | C8                     | 1.306 | -     |
| Poly(rC)-binding protein 1                                          | PCBP1    | Q15365 | 1515.864 | LVVPATQcGSL<br>IGK              | C8                     | 1.506 | 1.840 |
| Poly(rC)-binding protein 1                                          | PCBP1    | Q15365 | 1745.952 | AITIAGVPQSV<br>TEcVK            | C14                    | 2.029 | -     |
| Poly(rC)-binding protein 1                                          | PCBP1    | Q15365 | 2548.245 | VMTIPYQPMP<br>ASSPVlcAGGQ<br>DR | C17                    | 1.840 | 1.298 |
| Polyadenylate-binding<br>protein-interacting protein 1              | PAIP1    | Q9H074 | 1462.738 | IENVVLDANcS<br>R                | C10                    | 0.836 | -     |
| Pregnancy zone protein                                              | PZP      | P20742 | 1559.767 | DLFHcVSFTLP<br>R                | C5                     | -     | -     |
| Prelamin-A/C                                                        | LMNA     | P02545 | 1436.674 | AQNTWGcGNS<br>LR                | C7                     | 1.593 | -     |
| Pre-mRNA-processing factor<br>19                                    | PRPF19   | Q9UMS4 | 1687.899 | IWSVPNAScVQ<br>VVR              | C9                     | 1.421 | 2.660 |
| Pre-mRNA-splicing factor<br>ATP-dependent RNA<br>helicase DHX15     | DHX15    | O43143 | 961.495  | GVAcTQPR                        | C4                     | 0.949 | -     |
| Prenylcysteine oxidase 1                                            | PCYOX1   | Q9UHG3 | 1178.601 | cPSIILHDR                       | C1                     | -     | -     |
| Probable ATP-dependent<br>RNA helicase DDX5                         | DDX5     | P17844 | 1441.791 | GDGPIcLVLAP<br>TR               | C6                     | 1.388 | -     |
| Probable cytosolic iron-sulfur<br>protein assembly protein<br>CIAO1 | CIAO1    | O76071 | 991.416  | LAScSDDR                        | C4                     | -     | 1.243 |
| Procollagen-lysine,2-<br>oxoglutarate 5-dioxygenase 3               | PLOD3    | O60568 | 1164.536 | YDcVISSPR                       | C3                     | -     | 1.304 |
| Profilin-1                                                          | PFN1     | P07737 | 1239.567 | cYEMASHLR                       | C1                     | 1.450 | 1.243 |
| Prolow-density lipoprotein<br>receptor-related protein 1            | LRP1     | Q07954 | 971.514  | VcLWIGR                         | C2                     | 1.189 | 1.588 |

|                                                       |         |        |          |                           |     |        |       |
|-------------------------------------------------------|---------|--------|----------|---------------------------|-----|--------|-------|
| Prolow-density lipoprotein receptor-related protein 1 | LRP1    | Q07954 | 1096.448 | cEYDGSHR                  | C1  | 1.275  | 1.527 |
| Prolow-density lipoprotein receptor-related protein 1 | LRP1    | Q07954 | 1124.613 | LDGLcIPLR                 | C5  | 1.562  | -     |
| Prolow-density lipoprotein receptor-related protein 1 | LRP1    | Q07954 | 1163.519 | cTAYFEGSR                 | C1  | 5.318  | -     |
| Prolow-density lipoprotein receptor-related protein 1 | LRP1    | Q07954 | 1206.622 | ILQDDLtCR                 | C8  | 1.342  | -     |
| Prolyl 3-hydroxylase 1                                | P3H1    | Q32P28 | 1418.712 | TVTAEVQPQcGR              | C10 | 2.580  | 1.958 |
| Prolyl 3-hydroxylase 1                                | P3H1    | Q32P28 | 1943.970 | LDTPLYFSYSHLVcR           | C14 | -      | 2.789 |
| Prolyl 3-hydroxylase 3                                | P3H3    | Q8IVL6 | 1894.909 | LEEALQGSLAQMEScR          | C15 | 2.143  | -     |
| Prostaglandin E synthase 3                            | PTGES3  | Q15185 | 1518.732 | LTFScLGGSDNFK             | C5  | 0.875  | -     |
| Proteasome subunit alpha type-5                       | PSMA5   | P28066 | 2236.035 | GPQLFHMDPSGTFVQcDAR       | C16 | 3.524  | -     |
| Proteasome subunit alpha type-6                       | PSMA6   | P60900 | 1928.892 | ITENIGcVMTGMTADSR         | C7  | 2.009  | -     |
| Protein canopy homolog 2                              | CNPY2   | Q9Y2B0 | 1848.862 | TDLcDHALHISHDEL           | C4  | 10.957 | -     |
| Protein CYR61                                         | CYR61   | O00622 | 1172.500 | VTNDNPEcR                 | C8  | 1.348  | 0.695 |
| Protein deglycase DJ-1                                | PARK7   | Q99497 | 934.446  | DPVQcSR                   | C5  | 1.249  | 1.867 |
| Protein deglycase DJ-1                                | PARK7   | Q99497 | 1604.795 | DVVIcPDASLEDAK            | C5  | 1.459  | -     |
| Protein disulfide-isomerase A5                        | PDIA5   | Q14554 | 1405.681 | NQDLcQQEAVK               | C5  | 2.931  | -     |
| Protein flightless-1 homolog                          | FLII    | Q13045 | 1520.826 | VPEcLYTLPSLR              | C4  | 1.324  | -     |
| Protein kinase C delta type                           | PRKCD   | Q05655 | 1010.473 | cTGTAANSR                 | C1  | 1.858  | -     |
| Protein KRBA1                                         | KRBA1   | A5PL33 | 961.404  | AEAcESAR                  | C4  | -      | 1.478 |
| Protein PML                                           | PML     | P29590 | 1284.666 | TPTLTSIYcR                | C9  | 1.434  | -     |
| Protein PML                                           | PML     | P29590 | 1333.695 | QIVDAQAVcTR               | C9  | -      | -     |
| Protein S100-A11                                      | S100A11 | P31949 | 1375.730 | cIESLIAVFQK               | C1  | 1.147  | 1.806 |
| Protein SEC13 homolog                                 | SEC13   | P55735 | 982.467  | LATcSSDR                  | C4  | 1.828  | 1.650 |
| Protein SEC13 homolog                                 | SEC13   | P55735 | 2086.963 | VFIWTcDDASSNTWSPK         | C6  | -      | -     |
| Protein SEC13 homolog                                 | SEC13   | P55735 | 2462.208 | DVAWAPSIGLPTSTIAScSQDGR   | C18 | 1.122  | -     |
| Protein transport protein Sec23A                      | SEC23A  | Q15436 | 1515.765 | AVLNPLcQVDYR              | C7  | 1.495  | -     |
| Protein transport protein Sec31A                      | SEC31A  | O94979 | 1280.620 | cLSSATDPQTK               | C1  | -      | -     |
| Protein-glutamine gamma-glutamyltransferase 2         | TGM2    | P21980 | 1192.517 | DHHTADLcR                 | C8  | 0.290  | 0.849 |
| Protein-glutamine gamma-glutamyltransferase 2         | TGM2    | P21980 | 2000.959 | VVSGMVNcNDQQGVLLGR        | C8  | 0.285  | 0.758 |
| Putative annexin A2-like protein                      | ANXA2P2 | A6NMY6 | 1164.527 | ALLYLcGGDD                | C6  | 1.443  | -     |
| Putative annexin A2-like protein                      | ANXA2P2 | A6NMY6 | 1845.892 | GLGTDEDSLIEIcSR           | C14 | 1.252  | 1.213 |
| Putative heat shock 70 kDa protein 7                  | HSPA7   | P48741 | 1383.621 | FEELcSDLFR                | C5  | 2.165  | -     |
| Putative nucleoside diphosphate kinase                | NME2P1  | O60361 | 1124.557 | GDFcIQVGR                 | C4  | 1.252  | 1.272 |
| Putative Ras-related protein Rab-1C                   | RAB1C   | Q92928 | 834.492  | ScLLLR                    | C2  | 1.322  | 1.143 |
| Pyrroline-5-carboxylate reductase 1, mitochondrial    | PYCR1   | P32322 | 1513.793 | LLINAVEAScIR              | C11 | 0.391  | -     |
| Pyrroline-5-carboxylate reductase 1, mitochondrial    | PYCR1   | P32322 | 1518.838 | LLINAVEAScIR              | C11 | -      | -     |
| Pyruvate kinase PKLR                                  | PKLR    | P30613 | 2611.216 | AETSDVANAVLDGADcIMLSGETAK | C16 | -      | -     |
| Pyruvate kinase PKM                                   | PKM     | P14618 | 1432.765 | NTGIIcTIGPASR             | C6  | -      | -     |
| Pyruvate kinase PKM                                   | PKM     | P14618 | 1536.708 | cDENILWLDYK               | C1  | 1.692  | 1.837 |
| Pyruvate kinase PKM                                   | PKM     | P14618 | 1950.029 | AGKPVcATQMLESMIK          | C7  | 1.238  | 1.180 |
| Pyruvate kinase PKM                                   | PKM     | P14618 | 2567.203 | AEGSDVANAVLDGADcIMLSGETAK | C16 | 1.304  | 1.042 |
| Rab GDP dissociation inhibitor alpha                  | GDI1    | P31150 | 1906.854 | TDDYLDQPcLETVNR           | C9  | 1.038  | -     |

|                                                                                   |         |        |          |                         |         |       |       |
|-----------------------------------------------------------------------------------|---------|--------|----------|-------------------------|---------|-------|-------|
| Rab GDP dissociation inhibitor beta                                               | GDI2    | P50395 | 1252.750 | VlclLSHPIK              | C3      | 1.339 | 1.228 |
| Rab GDP dissociation inhibitor beta                                               | GDI2    | P50395 | 1975.877 | TDDYLDQPcY ETINR        | C9      | 1.181 | 1.034 |
| Ras-related C3 botulinum toxin substrate 2                                        | RAC2    | P15153 | 1133.604 | cVVVGdGAVG K            | C1      | 0.688 | -     |
| Ras-related C3 botulinum toxin substrate 2                                        | RAC2    | P15153 | 1313.656 | YlEcSALTQR              | C4      | 1.098 | 1.463 |
| Ras-related protein Rap-1b-like protein                                           | RAP1B   | A6NIZ1 | 1009.432 | cDLEDER                 | C1      | 1.565 | -     |
| Ras-related protein Rap-1b-like protein                                           | RAP1B   | A6NIZ1 | 1627.763 | QWNNcAFLES SAK          | C5      | 0.757 | 1.574 |
| Ras-related protein R-Ras                                                         | RRAS    | P10301 | 1155.587 | IcSVDGIPAR              | C2      | 0.352 | -     |
| Receptor expression-enhancing protein 5                                           | REEP5   | Q00765 | 1138.565 | NcMTDLLAK               | C2      | 1.574 | 1.828 |
| Receptor of activated protein C kinase 1                                          | RACK1   | P63244 | 1434.710 | YWLcAATGPSI K           | C4      | 1.470 | -     |
| Receptor of activated protein C kinase 1                                          | RACK1   | P63244 | 1980.953 | FSPNSSNPIIVS cGWdK      | C13     | 1.824 | 1.031 |
| Receptor of activated protein C kinase 1                                          | RACK1   | P63244 | 2054.928 | YTVQDESHSE WVScVR       | C14     | -     | 2.073 |
| Reticulon-4                                                                       | RTN4    | Q9NQC3 | 1636.825 | YSNSALGHVN cTIK         | C11     | 0.725 | 0.648 |
| Reversion-inducing cysteine-rich protein with Kazal motifs                        | RECK    | O95980 | 1724.667 | ScNAQSDQGA MNDMK        | C2      | 0.543 | -     |
| RGM domain family member B                                                        | RGMB    | Q6NW40 | 994.443  | AYAGcTQR                | C5      | 0.721 | 1.032 |
| Rho-related GTP-binding protein RhoC                                              | RHOC    | P08134 | 1153.671 | TcLLIVFSK               | C2      | -     | -     |
| Rho-related GTP-binding protein RhoC                                              | RHOC    | P08134 | 1413.668 | ISAFGYlEcSA K           | C9      | 0.819 | 1.458 |
| Rho-related GTP-binding protein RhoC                                              | RHOC    | P08134 | 1680.931 | HFcPNVPIILVG NK         | C3      | -     | -     |
| Ribonuclease inhibitor                                                            | RNH1    | P13489 | 1030.525 | DLcGIVASK               | C3      | 1.075 | 0.844 |
| Ribonuclease inhibitor                                                            | RNH1    | P13489 | 1222.579 | LDDcGLTEAR              | C4      | 1.027 | 1.222 |
| Ribonuclease inhibitor                                                            | RNH1    | P13489 | 1228.588 | DSPcQLEALK              | C4      | 1.088 | -     |
| Ribonuclease inhibitor                                                            | RNH1    | P13489 | 1543.697 | LEScGVTSDNc R           | C4; C11 | -     | -     |
| Ribonuclease inhibitor                                                            | RNH1    | P13489 | 1581.807 | ELcQGLGQPGS VLR         | C3      | 1.100 | 1.019 |
| Ribonuclease inhibitor                                                            | RNH1    | P13489 | 1921.037 | WAELLPLLQQ cQVVR        | C11     | 1.086 | 1.745 |
| Ribonuclease inhibitor                                                            | RNH1    | P13489 | 2082.055 | LGdVGMAlEc PGLLHPSSR    | C10     | 1.125 | 1.224 |
| Ribonuclease inhibitor                                                            | RNH1    | P13489 | 2488.283 | ELDLSNNcLGD AGILQLVESVR | C8      | -     | 1.388 |
| Ribose-phosphate pyrophosphokinase 1                                              | PRPS1   | P60891 | 1362.674 | NcTIVSPDAGG AK          | C2      | 1.256 | 0.724 |
| Ribose-phosphate pyrophosphokinase 1                                              | PRPS1   | P60891 | 1466.790 | VTAVIPcFPYA R           | C7      | 0.840 | 0.515 |
| Ribose-phosphate pyrophosphokinase 1                                              | PRPS1   | P60891 | 1822.829 | FSNQETcVEIG ESVR        | C7      | 0.778 | 0.292 |
| Ribosome-binding protein 1                                                        | RRBP1   | Q9P2E9 | 1685.785 | LTAEFEEAQTS AcR         | C13     | 1.509 | 0.960 |
| RNA 3'-terminal phosphate cyclase                                                 | RTCA    | O00442 | 1572.922 | VSTALScLLGL PLR         | C7      | 1.492 | -     |
| RNA polymerase II subunit A C-terminal domain phosphatase SSU72                   | SSU72   | Q9NP77 | 1306.660 | VAVVcSSNQN R            | C5      | -     | 2.004 |
| Sarcoplasmic/endoplasmic reticulum calcium ATPase 2                               | ATP2A2  | P16615 | 1453.767 | cLALATHDNPL R           | C1      | -     | -     |
| Sarcoplasmic/endoplasmic reticulum calcium ATPase 2                               | ATP2A2  | P16615 | 1557.746 | TGTLTTNQMo SVcR         | C12     | -     | 1.196 |
| Secernin-1                                                                        | SCRN1   | Q12765 | 1889.851 | SSPcIHFTGTP DPSR        | C4      | 1.154 | 1.165 |
| Semaphorin-7A                                                                     | SEMA7A  | O75326 | 1321.659 | SEGLLAcGTNA R           | C7      | 2.813 | -     |
| Septin-2                                                                          | Sept2   | Q15019 | 1823.903 | LTVVDTPGYG DAINcR       | C15     | 1.585 | 1.895 |
| Septin-7                                                                          | Sept7   | Q16181 | 1634.736 | ADTLTPEEcQQ FK          | C9      | -     | 0.934 |
| Serine/arginine-rich splicing factor 1                                            | SRSF1   | Q07955 | 1490.666 | EAGDVcYADV YR           | C6      | 2.079 | -     |
| Serine/threonine-protein phosphatase 2A 65 kDa regulatory subunit A alpha isoform | PPP2R1A | P30153 | 1380.631 | NLcSDDTPMV R            | C3      | 1.500 | 1.857 |

|                                                                                   |          |        |          |                                   |           |       |       |
|-----------------------------------------------------------------------------------|----------|--------|----------|-----------------------------------|-----------|-------|-------|
| Serine/threonine-protein phosphatase 2A 65 kDa regulatory subunit A alpha isoform | PPP2R1A  | P30153 | 1617.879 | ENVVMSQILPeI<br>K                 | C11       | 0.948 | 1.789 |
| Serine/threonine-protein phosphatase 2A catalytic subunit beta isoform            | PPP2CB   | P62714 | 1751.839 | cGNQAAIMEL<br>DDTLK               | C1        | 1.614 | -     |
| Serine/threonine-protein phosphatase 2A catalytic subunit beta isoform            | PPP2CB   | P62714 | 1776.882 | NVVTIFSAPNY<br>cYR                | C12       | 1.113 | 1.402 |
| Serine/threonine-protein phosphatase 2A catalytic subunit beta isoform            | PPP2CB   | P62714 | 1988.891 | AHQLVMEGY<br>NWcHDR               | C12       | -     | -     |
| Serine/threonine-protein phosphatase PP1-gamma catalytic subunit                  | PPP1CC   | P36873 | 1230.570 | GNHEcASINR                        | C5        | 1.616 | 1.755 |
| Serine/threonine-protein phosphatase PP1-gamma catalytic subunit                  | PPP1CC   | P36873 | 1795.889 | IcGDIHGQYYD<br>LLR                | C2        | 1.478 | 1.827 |
| Serpine B6                                                                        | SERPINB6 | P35237 | 1110.578 | TNGILFcGR                         | C7        | -     | -     |
| Serpine B6                                                                        | SERPINB6 | P35237 | 1186.522 | ScDFLSSFR                         | C2        | 0.702 | 0.981 |
| Serum albumin                                                                     | ALB      | P02768 | 1274.551 | ccTESLVNR                         | C1;<br>C2 | -     | -     |
| Serum albumin                                                                     | ALB      | P02768 | 1511.672 | YIcENQDSISSK                      | C3        | -     | 0.137 |
| Signal transducer and activator of transcription 1-alpha/beta                     | STAT1    | P42224 | 1490.747 | NLSFFLTPPcA<br>R                  | C10       | 0.442 | 0.799 |
| Small nuclear ribonucleoprotein Sm D2                                             | SNRPD2   | P62316 | 1304.680 | NNTQVLINcR                        | C9        | 1.174 | 1.123 |
| Small nuclear ribonucleoprotein Sm D2                                             | SNRPD2   | P62316 | 1316.652 | HcNMVLENVK                        | C2        | -     | -     |
| Small nuclear ribonucleoprotein-associated proteins B and B'                      | SNRPB    | P14678 | 929.452  | cILQDGR                           | C1        | -     | 0.536 |
| S-methyl-5'-thioadenosine phosphorylase                                           | MTAP     | Q13126 | 2073.930 | TTMRPQSFYD<br>GSHScAR             | C15       | -     | -     |
| Sorting nexin-12                                                                  | SNX12    | Q9UMY4 | 1734.841 | cLHMFLQEEAI<br>DR                 | C1        | -     | -     |
| SPARC                                                                             | SPARC    | P09486 | 1520.693 | TFDSScHFFAT<br>K                  | C6        | -     | -     |
| Spectrin alpha chain, non-erythrocytic 1                                          | SPTAN1   | Q13813 | 1137.527 | GAcAGSEDAV<br>K                   | C3        | 1.208 | -     |
| Spectrin alpha chain, non-erythrocytic 1                                          | SPTAN1   | Q13813 | 1548.775 | VNDVcTNGQD<br>LIK                 | C5        | 0.884 | -     |
| Spectrin alpha chain, non-erythrocytic 1                                          | SPTAN1   | Q13813 | 1553.652 | DeEQAENWMA<br>AR                  | C2        | 0.736 | -     |
| Spliceosome RNA helicase DDX39B                                                   | DDX39B   | Q13838 | 1379.727 | NcPHIVVGTGP<br>R                  | C2        | 1.525 | -     |
| Src substrate cortactin                                                           | CTTN     | Q14247 | 1160.553 | HcSQVDSVR                         | C2        | 0.765 | -     |
| Staphylococcal nuclease domain-containing protein 1                               | SND1     | Q7KZF4 | 1166.541 | LSEcEEQAK                         | C4        | 1.888 | 1.783 |
| Superoxide dismutase [Cu-Zn]                                                      | SOD1     | P00441 | 1074.604 | LAcGVIGIAQ                        | C3        | 1.215 | 1.312 |
| Surfeit locus protein 4                                                           | SURF4    | O15260 | 1604.834 | LeLISTFLEDGI<br>R                 | C2        | -     | 1.703 |
| Synaptic vesicle membrane protein VAT-1 homolog                                   | VAT1     | Q99536 | 1397.674 | cLVLGTGGY<br>DK                   | C1        | -     | -     |
| Synaptic vesicle membrane protein VAT-1 homolog                                   | VAT1     | Q99536 | 1411.685 | AcGLNFADLM<br>AR                  | C2        | 0.985 | 0.967 |
| Talin-1                                                                           | TLN1     | Q9Y490 | 978.484  | AVAAGNScR                         | C8        | -     | -     |
| Talin-1                                                                           | TLN1     | Q9Y490 | 1191.531 | cTQDLGNSTK                        | C1        | 1.824 | 1.950 |
| Talin-1                                                                           | TLN1     | Q9Y490 | 1479.712 | TVTDMMLMTIc<br>AR                 | C10       | -     | -     |
| Talin-1                                                                           | TLN1     | Q9Y490 | 1528.819 | ASAGPQPLLV<br>QScK                | C13       | 1.235 | -     |
| Talin-1                                                                           | TLN1     | Q9Y490 | 1541.728 | AGALQcSPSDA<br>YTK                | C6        | -     | -     |
| Talin-1                                                                           | TLN1     | Q9Y490 | 2629.249 | MVAAATNNLc<br>EAANAAVQGH<br>ASQEK | C10       | 2.276 | -     |
| TAR DNA-binding protein 43                                                        | TARDBP   | Q13148 | 1064.502 | NPVScMR                           | C6        | 1.080 | -     |
| T-complex protein 1 subunit alpha                                                 | TCP1     | P17987 | 1304.716 | IcDDELILIK                        | C2        | -     | -     |
| T-complex protein 1 subunit alpha                                                 | TCP1     | P17987 | 1376.717 | VLeELADLQD<br>K                   | C3        | -     | -     |
| T-complex protein 1 subunit beta                                                  | CCT2     | P78371 | 1627.888 | SLHDALcVLA<br>QTVK                | C7        | 1.589 | -     |

|                                                   |        |        |          |                        |                        |       |       |
|---------------------------------------------------|--------|--------|----------|------------------------|------------------------|-------|-------|
| T-complex protein 1 subunit delta                 | CCT4   | P50991 | 1251.653 | SIHDALcVIR             | C7                     | 1.288 | 1.167 |
| T-complex protein 1 subunit delta                 | CCT4   | P50991 | 1256.684 | SLHDALcVIR             | C7                     | -     | 1.121 |
| T-complex protein 1 subunit eta                   | CCT7   | Q99832 | 1206.569 | YNFFTGePK              | C7                     | -     | -     |
| T-complex protein 1 subunit eta                   | CCT7   | Q99832 | 1625.761 | cQVFEETQIGGER          | C1                     | -     | -     |
| T-complex protein 1 subunit gamma                 | CCT3   | P49368 | 919.544  | AcTILLR                | C2                     | 1.341 | -     |
| T-complex protein 1 subunit gamma                 | CCT3   | P49368 | 1302.589 | NLQDAMQVcR             | C9                     | 2.024 | 1.479 |
| T-complex protein 1 subunit gamma                 | CCT3   | P49368 | 1406.749 | TLIQNcGASTIR           | C6                     | 1.902 | 1.814 |
| Testin                                            | TES    | Q9UGI8 | 966.446  | cHELSPR                | C1                     | 0.424 | -     |
| Tetraspanin-6                                     | TSPAN6 | O43657 | 1091.518 | LEDcTPQR               | C4                     | -     | 1.154 |
| Thioredoxin                                       | TXN    | P10599 | 1278.608 | cMPTFQFFK              | C1                     | 1.486 | -     |
| Thioredoxin domain-containing protein 5           | TXNDC5 | Q8NBS9 | 1236.594 | IAEVDcTAER             | C6                     | 1.091 | 0.975 |
| Thrombospondin-1                                  | THBS1  | P07996 | 1038.469 | ScDSLNNR               | C2                     | 2.405 | 1.696 |
| Thrombospondin-1                                  | THBS1  | P07996 | 1096.510 | cEGSSVQTR              | C1                     | 2.994 | 1.643 |
| Thrombospondin-1                                  | THBS1  | P07996 | 1212.597 | AQLYIDcEK              | C7                     | -     | -     |
| Thrombospondin-1                                  | THBS1  | P07996 | 1405.696 | LcNNPTPQFGGK           | C2                     | 1.296 | 0.792 |
| Thrombospondin-1                                  | THBS1  | P07996 | 1646.728 | DNcQYVYNVDQR           | C3                     | 3.936 | 0.994 |
| Thrombospondin-1                                  | THBS1  | P07996 | 1732.872 | RPPLcYHNGVQYR          | C5                     | -     | -     |
| Thrombospondin-1                                  | THBS1  | P07996 | 1748.759 | cNYLGHYSDFMYR          | C1                     | 2.782 | 1.130 |
| Thrombospondin-1                                  | THBS1  | P07996 | 2147.894 | DNcPFHYNPAQYDYDR       | C3                     | 2.124 | -     |
| Thrombospondin-1                                  | THBS1  | P07996 | 2168.976 | cENTDPGYNcLPePPR       | C1;<br>C10<br>;<br>C13 | -     | -     |
| Thy-1 membrane glycoprotein                       | THY1   | P04216 | 1635.880 | VTSLTAcLVDQSLR         | C7                     | 1.322 | 2.261 |
| Transcription elongation factor A protein 2       | TCEA2  | Q15560 | 1343.645 | NcTYTQVQTR             | C2                     | -     | -     |
| Transforming protein RhoA                         | RHOA   | P61586 | 1406.652 | IGAFGYMEcSAK           | C9                     | 0.740 | 1.062 |
| Transgelin                                        | TAGLN  | Q01995 | 2182.152 | LVEWHIVQcGPDVGRPDR     | C9                     | 1.500 | 1.000 |
| Transgelin-2                                      | TAGLN2 | P37802 | 951.455  | NMAcVQR                | C4                     | 1.193 | 2.248 |
| Transitional endoplasmic reticulum ATPase         | VCP    | P55072 | 1608.831 | LGDVISIQPcPDVK         | C10                    | 2.007 | 0.264 |
| Transitional endoplasmic reticulum ATPase         | VCP    | P55072 | 1997.009 | QAAPcVLFFDELDSIAK      | C5                     | -     | -     |
| Transketolase                                     | TKT    | P29401 | 1719.823 | TVPFcSTFAAFcFTR        | C5                     | -     | 1.124 |
| Transketolase-like protein 2                      | TKTL2  | Q9H0I9 | 2409.162 | FIECIIAEQNMoVSVAlGcATR | C18                    | -     | -     |
| Translationally-controlled tumor protein          | TPT1   | P13693 | 1505.762 | EIADGLcLEVEGK          | C7                     | -     | 1.194 |
| Transmembrane 9 superfamily member 3              | TM9SF3 | Q9HD45 | 1362.662 | NLSGQPNFPcR            | C10                    | 1.002 | 0.703 |
| Trifunctional enzyme subunit alpha, mitochondrial | HADHA  | P40939 | 1379.689 | cLAPMMSEVIR            | C1                     | -     | -     |
| TRIO and F-actin-binding protein                  | TRIOBP | Q9H2D6 | 1496.669 | ScTDVTEYAVQR           | C2                     | 0.945 | 2.380 |
| Triosephosphate isomerase                         | TPI1   | P60174 | 1210.631 | IAVAAQNcYK             | C8                     | -     | 1.616 |
| Triosephosphate isomerase                         | TPI1   | P60174 | 1394.700 | IYGGSVcTGATcK          | C12                    | 0.836 | 1.623 |
| Triosephosphate isomerase                         | TPI1   | P60174 | 1654.769 | DcGATWVVLGHSER         | C2                     | 0.948 | 1.545 |
| Triosephosphate isomerase                         | TPI1   | P60174 | 1881.031 | VAHALAeGLGVIAcIGEK     | C14                    | 0.900 | 1.356 |
| Triosephosphate isomerase                         | TPI1   | P60174 | 2265.130 | VPADTEVVCAPPTAYIDFAR   | C9                     | 0.899 | 1.261 |
| Tripeptidyl-peptidase 2                           | TPP2   | P29144 | 1496.661 | AcIDSNEDGDLcSK         | C2                     | -     | -     |
| Tropomyosin alpha-1 chain                         | TPM1   | P09493 | 1193.579 | cAELEEEELK             | C1                     | 6.455 | -     |
| Tropomyosin alpha-4 chain                         | TPM4   | P67936 | 1165.548 | cGDLEEEELK             | C1                     | 1.658 | -     |
| Tropomyosin alpha-4 chain                         | TPM4   | P67936 | 2413.176 | EENVGLHQTLcDQTLNELNcI  | C19                    | -     | 2.637 |



|                                                     |        |        |          |                                    |           |       |       |
|-----------------------------------------------------|--------|--------|----------|------------------------------------|-----------|-------|-------|
| Tubulin alpha-1C chain                              | TUBA1C | Q9BQE3 | 1671.826 | TIQFVDWcPTG<br>FK                  | C8        | 1.315 | 0.963 |
| Tubulin alpha-1C chain                              | TUBA1C | Q9BQE3 | 1923.953 | AVcMLSNTTA<br>VAEAWAR              | C3        | 1.159 | 1.309 |
| Tubulin alpha-4A chain                              | TUBA4A | P68366 | 1385.604 | YMAccLLYR                          | C4;<br>C5 | -     | -     |
| Tubulin alpha-4A chain                              | TUBA4A | P68366 | 1652.779 | SIQFVDWcPTG<br>FK                  | C8        | 1.112 | 1.074 |
| Tubulin alpha-4A chain                              | TUBA4A | P68366 | 1932.933 | AVcMLSNTTAI<br>AEAWAR              | C3        | 1.141 | 1.211 |
| Tubulin alpha-4A chain                              | TUBA4A | P68366 | 1948.926 | AVcMoLSNTTA<br>IAEAWAR             | C3        | 0.982 | 1.993 |
| Tubulin alpha-4A chain                              | TUBA4A | P68366 | 2823.354 | AYHEQLSVAEI<br>TNAcFEPANQ<br>MVK   | C15       | 1.210 | 1.764 |
| Tubulin beta-3 chain                                | TUBB3  | Q13509 | 1099.599 | VAVcDIPPR                          | C4        | -     | -     |
| Tubulin beta-4A chain                               | TUBB4A | P04350 | 1101.577 | TAVcDIPPR                          | C4        | 1.167 | -     |
| Tubulin beta-4A chain                               | TUBB4A | P04350 | 1890.954 | EIVHLQAGQcG<br>NQIGAK              | C10       | -     | 0.966 |
| Tubulin beta-4A chain                               | TUBB4A | P04350 | 2781.398 | LTTPTYGDLN<br>HLVSATMSGV<br>TTcLR  | C23       | 1.245 | 1.116 |
| Tubulin beta-4A chain                               | TUBB4A | P04350 | 2797.392 | LTTPTYGDLN<br>HLVSATMoSG<br>VTTcLR | C23       | 1.109 | -     |
| Tubulin beta-6 chain                                | TUBB6  | Q9BUF5 | 2855.335 | ALTVPELTQQ<br>MFDARNMoM<br>AAcDPR  | C21       | -     | -     |
| Tubulin-folding cofactor B                          | TBCB   | Q99426 | 2095.968 | LDQEDALLGS<br>YPVDDGcR             | C17       | 1.569 | 0.775 |
| Ubiquitin carboxyl-terminal<br>hydrolase 14         | USP14  | P54578 | 1413.611 | cTESEEEEVTK                        | C1        | 2.099 | -     |
| Ubiquitin carboxyl-terminal<br>hydrolase isozyme L1 | UCHL1  | P09936 | 968.529  | FSAVALcK                           | C7        | 2.973 | 0.469 |
| Ubiquitin carboxyl-terminal<br>hydrolase isozyme L1 | UCHL1  | P09936 | 2040.960 | NEAIQAAHDA<br>VAQEGQcR             | C17       | -     | -     |
| Ubiquitin-60S ribosomal<br>protein L40              | UBA52  | P62987 | 1269.653 | cGHTNNLRPK                         | C1        | -     | -     |
| Ubiquitin-conjugating<br>enzyme E2 D1               | UBE2D1 | P51668 | 2167.098 | IYHPNINSNGSI<br>cLDILR             | C13       | -     | 0.473 |
| Ubiquitin-conjugating<br>enzyme E2 N                | UBE2N  | P61088 | 947.565  | IcLDILK                            | C2        | 1.411 | -     |
| Ubiquitin-like modifier-<br>activating enzyme 1     | UBA1   | P22314 | 1091.509 | VGEFcHNR                           | C5        | 1.164 | 0.679 |
| Ubiquitin-like modifier-<br>activating enzyme 1     | UBA1   | P22314 | 1518.729 | DNPGVVtLD<br>EAR                   | C8        | 2.162 | -     |
| Uroporphyrinogen<br>decarboxylase                   | UROD   | P06132 | 1270.554 | AAQDFSTcR                          | C9        | 1.440 | 0.477 |
| Vacuolar protein sorting-<br>associated protein 35  | VPS35  | Q96QK1 | 1022.535 | TQcALAASK                          | C3        | -     | -     |
| Vacuolar protein sorting-<br>associated protein 35  | VPS35  | Q96QK1 | 1140.588 | NYLLQcTR                           | C6        | -     | 1.047 |
| Valine--tRNA ligase                                 | VAR5   | P26640 | 1241.676 | IcLQPPPTSR                         | C2        | -     | -     |
| Versican core protein                               | VCAN   | P13611 | 1155.594 | AQcGGGLLGV<br>R                    | C3        | -     | 0.824 |
| Vesicular integral-membrane<br>protein VIP36        | LMAN2  | Q12907 | 1120.584 | NcIDITGVR                          | C2        | 1.871 | -     |
| Vesicular integral-membrane<br>protein VIP36        | LMAN2  | Q12907 | 1499.700 | WTELAGcTAD<br>FR                   | C7        | 2.085 | 1.283 |
| Vigilin                                             | HDLBP  | Q00341 | 976.420  | DcDPGSPR                           | C2        | 2.657 | -     |
| Vigilin                                             | HDLBP  | Q00341 | 1119.625 | cDIIISGR                           | C1        | -     | -     |
| Vigilin                                             | HDLBP  | Q00341 | 1135.603 | IcLEIMQR                           | C2        | 1.798 | -     |
| Vigilin                                             | HDLBP  | Q00341 | 1275.726 | RcDIIISGR                          | C2        | -     | 2.118 |
| Vimentin                                            | VIM    | P08670 | 1563.815 | QVQSLTeEVD<br>ALK                  | C7        | 1.321 | 1.440 |
| Vinculin                                            | VCL    | P18206 | 1133.555 | IAELcDDPK                          | C5        | -     | 0.230 |
| Vinculin                                            | VCL    | P18206 | 1205.636 | TNLLQVcER                          | C7        | -     | -     |
| Vinculin                                            | VCL    | P18206 | 1989.026 | cDRVDQLTAQ<br>LADLAAR              | C1        | 1.506 | -     |
| WD repeat-containing protein<br>1                   | WDR1   | O75083 | 864.465  | VcALGGSK                           | C2        | -     | -     |
| WD repeat-containing protein<br>1                   | WDR1   | O75083 | 2116.972 | LATGSDDNcA<br>AFFEGPPFK            | C9        | -     | -     |
| WD repeat-containing protein<br>1                   | WDR1   | O75083 | 2211.963 | MTVDESQLIS<br>cSMDDTVR             | C12       | 1.567 | 1.035 |

|                                            |         |        |          |                                               |    |       |       |
|--------------------------------------------|---------|--------|----------|-----------------------------------------------|----|-------|-------|
| WD repeat-containing protein 1             | WDR1    | O75083 | 3470.680 | cFSIDNPGYEPE<br>VVAVHPGGDT<br>VAIGGVDGNV<br>R | C1 | -     | -     |
| WD repeat-containing protein 3             | WDR3    | Q9UNX4 | 1420.673 | IWGLDFGDcH<br>K                               | C9 | -     | -     |
| X-ray repair cross-complementing protein 5 | XRCC5   | P13010 | 1159.647 | LFQcLLHR                                      | C4 | 1.185 | -     |
| Zinc finger CCCH-type antiviral protein 1  | ZC3HAV1 | Q7Z2W4 | 1116.479 | cNYSQSER                                      | C1 | -     | -     |
| Zyxin                                      | ZYX     | Q15942 | 949.468  | cHQPLAR                                       | C1 | 1.472 | 1.433 |
| Zyxin                                      | ZYX     | Q15942 | 1332.674 | QNVAVNELcG<br>R                               | C9 | 1.251 | 1.320 |

**Appendix Table S2.** Acylcarnitine profile in blood of *Pdss2*<sup>kd/kd</sup> mice

| Subject ID | C0-AC (ng/ml)    | C2-AC (ng/ml)    | C3-AC (ng/ml)    | C04-AC (ng/ml)   | C5-AC (ng/ml)    | C6-AC (ng/ml)    |
|------------|------------------|------------------|------------------|------------------|------------------|------------------|
| WT         | 2002.46 ± 173.42 | 3855.64 ± 408.78 | 609.39 ± 128.9   | 279.84 ± 64.74   | 30.31 ± 4.2      | 50.24 ± 10.23    |
| MUT        | 2041.014 ± 172   | 4541.35 ± 645.82 | 716.1 ± 168.7    | 659.17 ± 153.1   | 50.6 ± 12.95     | 114.68 ± 45.9    |
| Subject ID | C8-AC (ng/ml)    | C8:1-AC (ng/ml)  | C10-AC (ng/ml)   | C10:1-AC (ng/ml) | C10:2-AC (ng/ml) | C12-AC (ng/ml)   |
| WT         | 5.43 ± 0.819     | <1.00            | 4.84 ± 0.86      | 3.78 ± 0.33      | <1.00            | 4.05 ± 0.36      |
| MUT        | 6.45 ± 1.94      | <1.00            | 4.37 ± 1.66      | 3.86 ± 1.58      | <1.00            | 4.42 ± 1.85      |
| Subject ID | C12:1-AC (ng/ml) | C14-AC (ng/ml)   | C14:1-AC (ng/ml) | C14:2-AC (ng/ml) | C16-AC (ng/ml)   | C16:1-AC (ng/ml) |
| WT         | 1.76 ± 0.56      | 13.88 ± 0.88     | 12.06 ± 1.96     | 3.53 ± 0.3       | 19.93 ± 1.38     | 4.1 ± 0.62       |
| MUT        | 4.29 ± 3.95      | 18.9 ± 5.7       | 18.51 ± 12.16    | 5.39 ± 3.87      | 37.2 ± 12.68     | 9.23 ± 4.63      |
