# Supplementary material for: Coenzyme Q deficiency causes impairment of the sulfide oxidation pathway
Source: PubMed Central journal article supplement (PMC5210092; doi:10.15252/emmm.201606356), 2016-11-17
Supplement: EMMM-9-96-s003.pdf [file EMMM-9-96-s003.pdf]

SourceDataForFigure4A: Unedited membrane for SQR and TST western blots

Cut; Vinculin

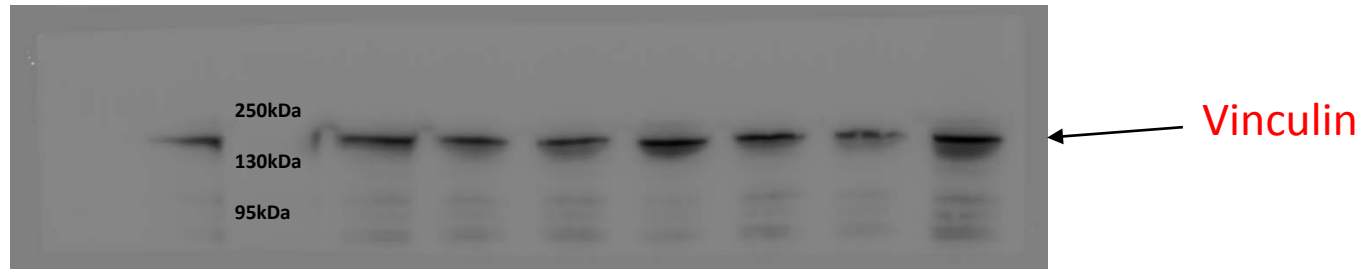

Cut; TST

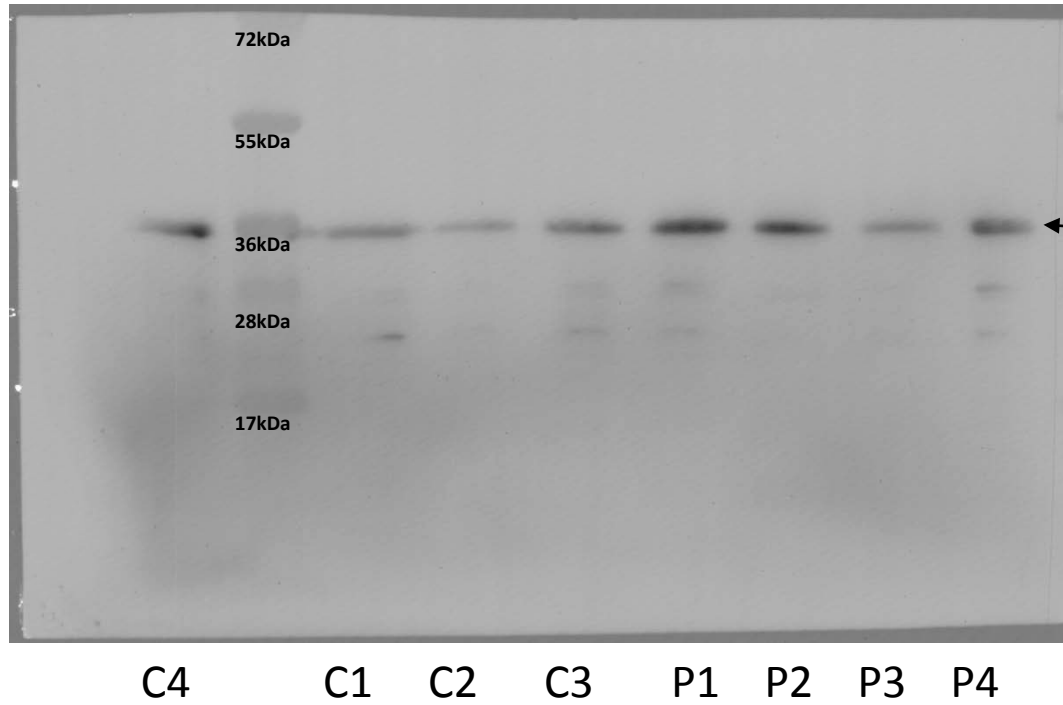

Cut; SQR

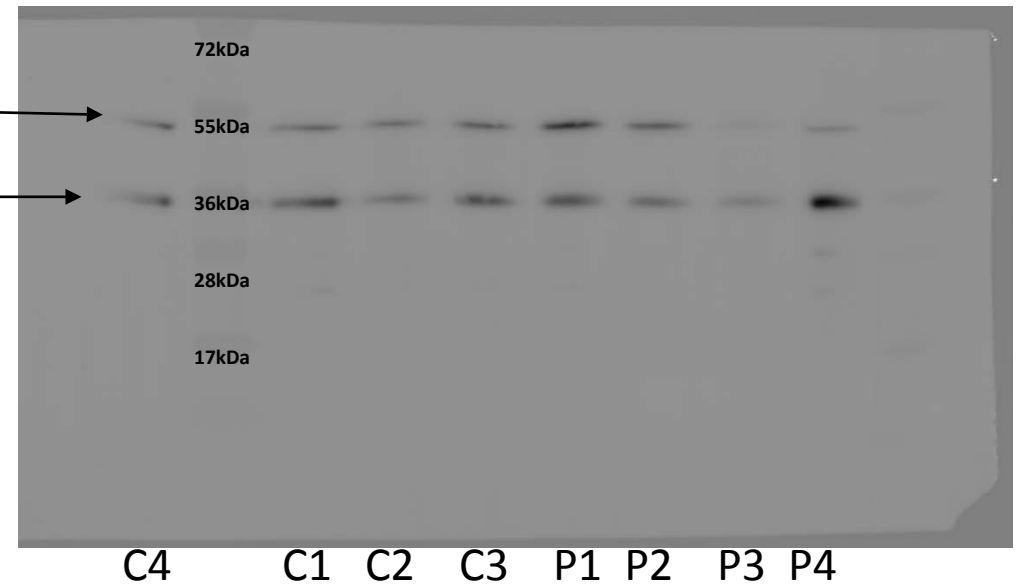

SourceDataForFigure4A: Unedited membrane for SUOX western blots

Uncut Vinculin

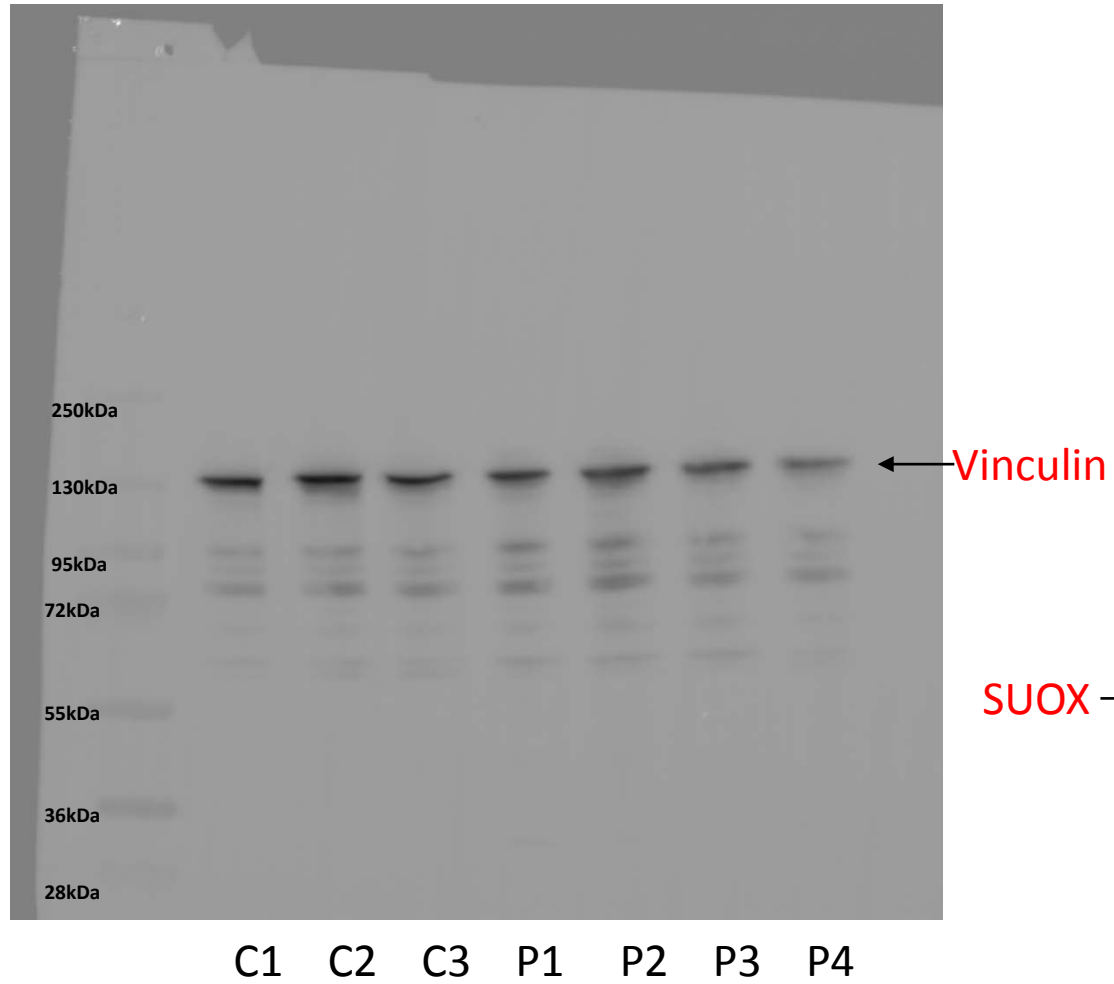

Uncut SUOX

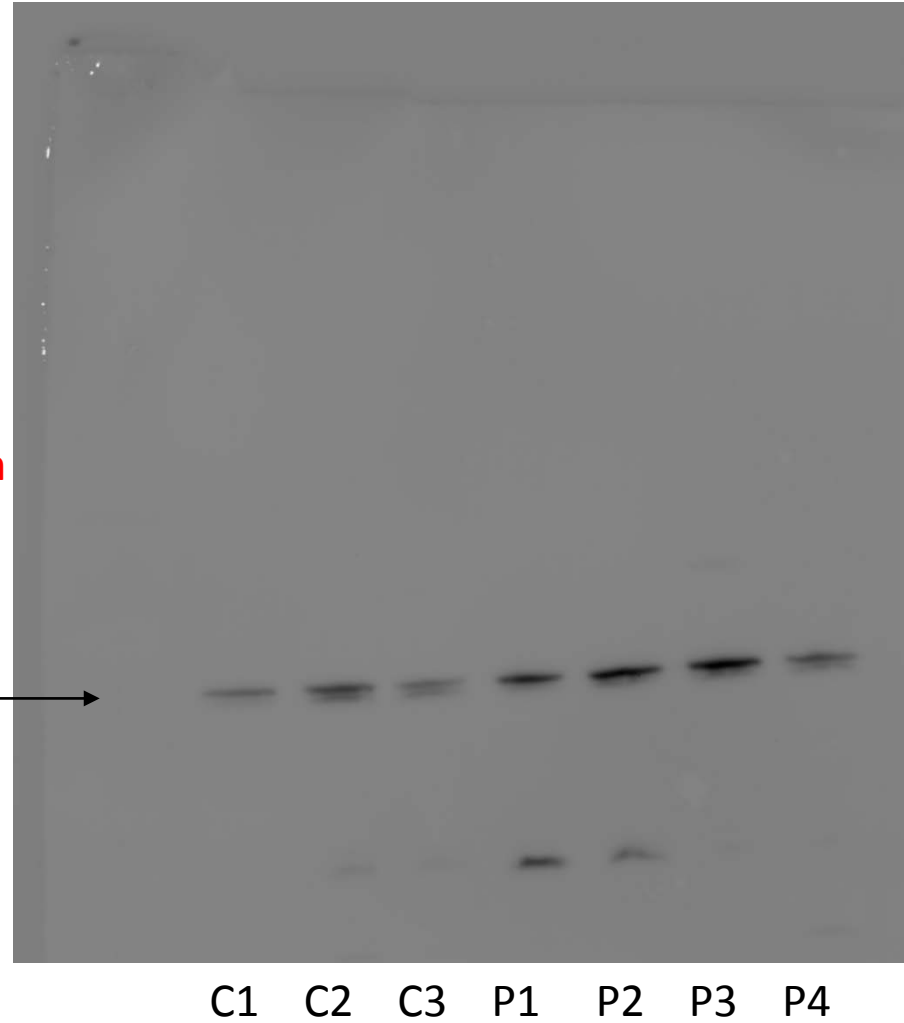

SourceDataForFigure4A: Unedited membrane for ETHE1 western blot

Cut; Vinculin

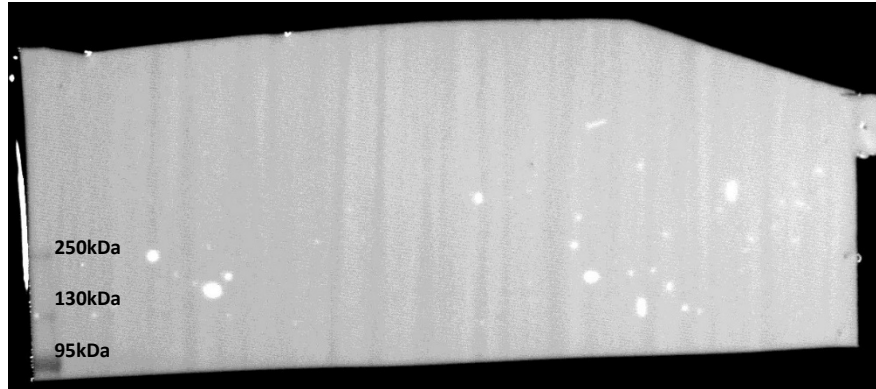

Vinculin

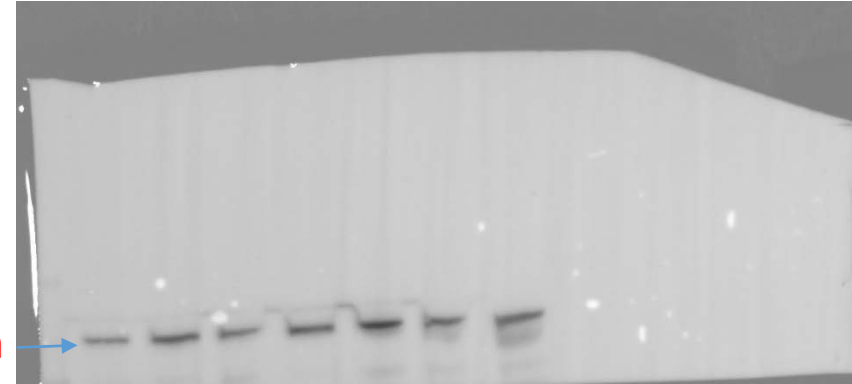

C1 C2 C3 P1 P2 P3 P4

Cut; ETHE1

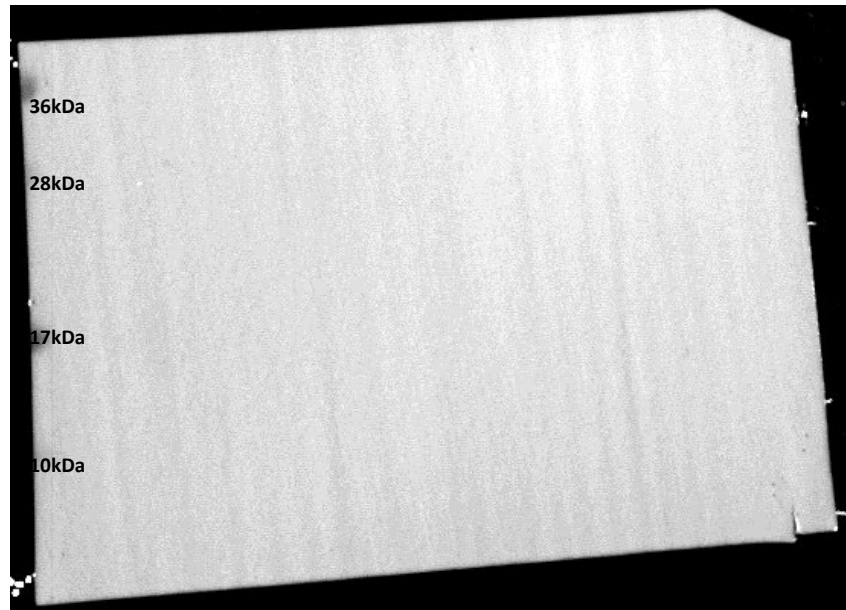

ETHE1

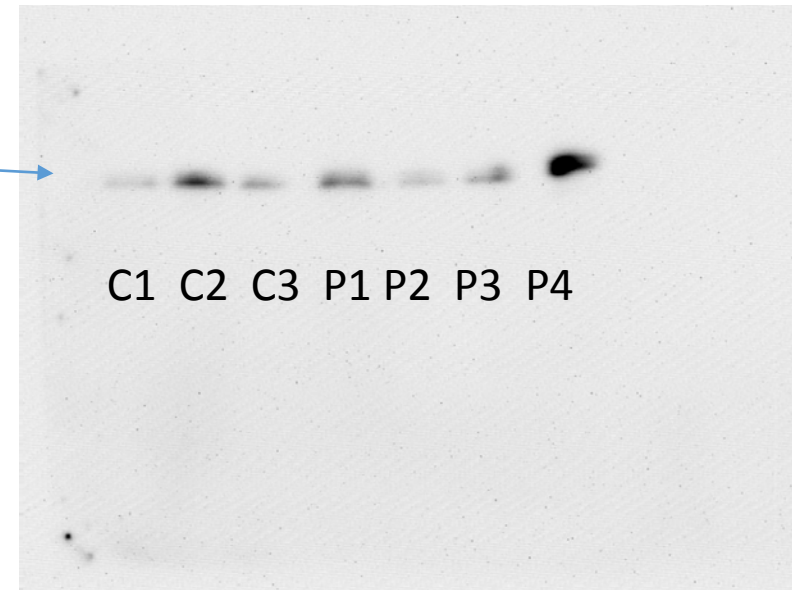

C1 C2 C3 P1 P2 P3 P4
